# Supplementary material for: The atmospheric fate of 1,2-dibromo-4-(1,2-dibromoethyl)cyclohexane (TBECH): spatial patterns, seasonal variability, and deposition to Canadian coastal regions
Source: Copernicus journal article supplement (doi:10.5194/acp-23-10191-2023), 2023-09-12
Supplement: Supplementary file 1 [file acp-23-10191-2023-supplement.pdf]

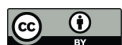

*Supplement of*

**The atmospheric fate of 1,2-dibromo-4-(1,2-dibromoethyl)cyclohexane (TBECH): spatial patterns, seasonal variability, and deposition to Canadian coastal regions**

**Jenny Oh et al.**

*Correspondence to:* Frank Wania ([frank.wania@utoronto.ca](mailto:frank.wania@utoronto.ca))

The copyright of individual parts of the supplement might differ from the article licence.

## Table of Contents

|           |                                                                                                                                                    | Page    |
|-----------|----------------------------------------------------------------------------------------------------------------------------------------------------|---------|
| Text S1   | Details on passive air sampling                                                                                                                    | S3      |
| Figure S1 | Maps with the passive air sampling sites and their codes                                                                                           | S3      |
| Table S1  | Information on the passive air samples                                                                                                             | S4-S6   |
| Table S2  | Information on the active air sampling                                                                                                             | S7-S8   |
| Table S3  | Information of precipitation sampling                                                                                                              | S9      |
| Table S4  | Detection frequencies of the target BFRs/HFRs in passive air and water samplers                                                                    | S10     |
| Table S5  | PBDE air concentrations in active air samplers                                                                                                     | S11     |
| Table S6  | Other BFR/HFR air concentrations in active air samplers                                                                                            | S12     |
| Table S7  | PBDE precipitation concentrations                                                                                                                  | S13     |
| Table S8  | Other BFR/HFR precipitation concentrations                                                                                                         | S14     |
| Text S2   | Details on passive water sampling                                                                                                                  | S15     |
| Table S9  | Information on the passive water samples                                                                                                           | S15-S16 |
| Figure S2 | Maps with the passive water sampling sites                                                                                                         | S16     |
| Text S3   | Details on sample extraction methods                                                                                                               | S16-S17 |
| Text S4   | Details on instrumental analysis and QA/QC procedures                                                                                              | S17-S18 |
| Table S10 | Precursor and product ions and collision energies                                                                                                  | S18-S19 |
| Table S11 | Summary of the recoveries                                                                                                                          | S19     |
| Table S12 | LODs and LOQs                                                                                                                                      | S19     |
| Text S5   | Details on calculation of air and water concentrations                                                                                             | S19     |
| Text S6   | Details on COSMOtherm predictions                                                                                                                  | S20     |
| Table S13 | Comparison with literature data on TBECH in the atmosphere                                                                                         | S21     |
| Figure S3 | The spatial distribution of the atmospheric $\alpha$ -/ $\beta$ -TBECH ratios                                                                      | S22     |
| Figure S4 | Relationship between the air concentration of $\alpha$ - and $\beta$ -TBECH and BDE-47                                                             | S23     |
| Table S14 | Linear regression parameters for Figure S4                                                                                                         | S23     |
| Figure S5 | Relationship between the air concentration and population                                                                                          | S24     |
| Table S15 | Linear regression parameters for Figure S5                                                                                                         | S25     |
| Figure S6 | Temperature dependence of the air concentrations                                                                                                   | S26     |
| Table S16 | Linear regression parameters for Figure S6                                                                                                         | S26     |
| Text S7   | Investigating the influence of wind on the concentrations in Toronto                                                                               | S27     |
| Figure S7 | Population density map of the Greater Toronto Area with wind origin                                                                                | S27     |
| Table S17 | Multiple linear regression parameters for relationships between the logarithm of the partial pressure and reciprocal temperature and wind fraction | S28     |
| Figure S8 | Seasonal variability of air concentrations, temperature and air mass history on Saturna Island                                                     | S29     |
| Figure S9 | Seasonal variability of air concentrations, temperature and air mass history at Tadoussac                                                          | S30     |
| Text S8   | Investigating the influence of air mass origin on the concentrations in Saturna Island and Tadoussac                                               | S31-S32 |
| Fig. S10  | Map with water concentrations of TBECH                                                                                                             | S32     |
| Fig. S11  | Map with a $\alpha$ -/ $\beta$ -TBECH ratios in water                                                                                              | S33     |
| Fig. S12  | Map with water concentrations of BDE-47                                                                                                            | S33     |
| Fig. S13  | The seasonal variation of BFR concentration in precipitation samples                                                                               | S34     |

|           |                                                                                     |         |
|-----------|-------------------------------------------------------------------------------------|---------|
| Table S18 | Chiral composition of $\alpha$ -TBECH in passive air samplers                       | S34     |
| Table S19 | Chiral composition of $\alpha$ -TBECH in active air samplers                        | S34     |
| Fig. S14  | Temperature dependence of $EF_{Dev}$ of Toronto active air samples                  | S35     |
| Table S20 | Linear regression parameters for Figure S14                                         | S35     |
| Table S21 | Chiral composition of $\alpha$ -TBECH in passive water samplers                     | S35     |
| Text S9   | Calculating water-air fugacity ratios and scavenging ratios                         | S35-S36 |
| Fig. S15  | The spatial distribution of the water-air fugacity ratios of TBECH                  | S37     |
| Fig. S16  | The spatial distribution of the water-air fugacity ratios of BDE-47                 | S37     |
| Fig. S17  | The seasonal variation of the logarithmic scavenging ratios                         | S38     |
| Fig. S18  | The seasonal variation of the logarithmic rainwater-air fugacity ratios             | S38     |
| Fig. S19  | The temperature dependence of the scavenging ratio of BDE-47                        | S39     |
| Table S22 | Linear regression parameters for the temperature dependence of the scavenging ratio | S39     |
|           | References                                                                          | S40-S42 |

## Text S1 Details on passive air sampling

86 and 83 passive air samplers (PASs) were obtained from Quebec (QC) and British Columbia (BC), respectively (Table S1). In QC, there were three deployment periods across 71 unique sites (Figure S1 right panel), with 48 PASs deployed from November 2019 to August 2020, 13 replicate PASs from August 2020 to July 2021, and 23 PASs and two replicate PASs from July 2021 to May 2022. In BC, there were three deployment periods across 47 unique sites (Figure S1 left panel), with 25 PASs and one replicate PAS deployed from October 2020 to November 2020, 23 PASs from August 2021 to February 2022, and 35 replicate PASs from July 2020 to April 2022. In Table S1, PASs deployed at the same site a second and third time are designated by  $\_2$ ,  $\_3$ , etc.

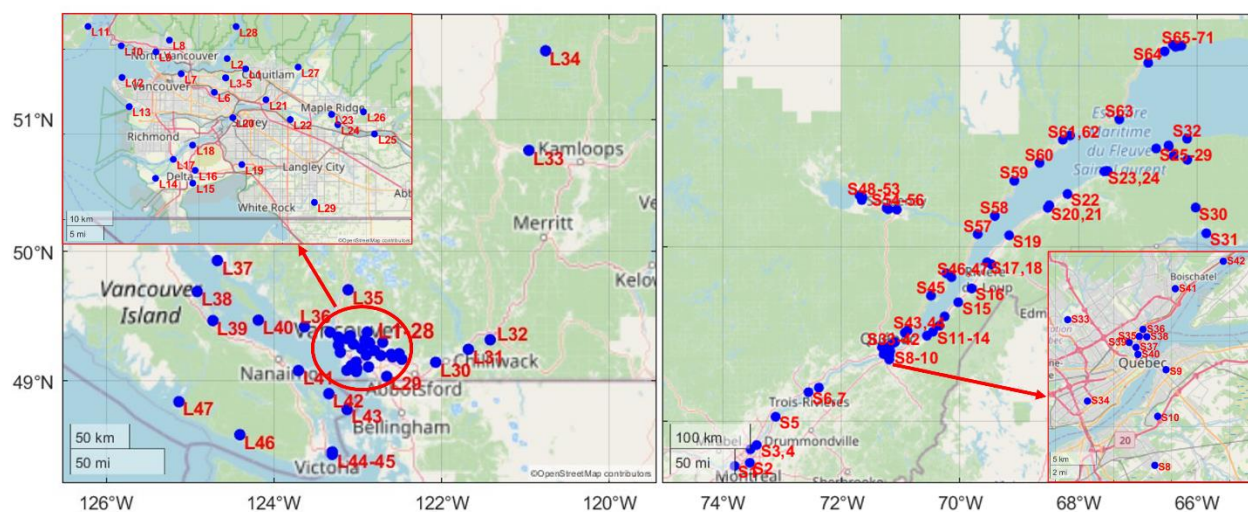

Figure S1 Maps with the passive air sampling sites and their codes in British Columbia (left) and Quebec (right). The inset map in the upper left shows the Vancouver metropolitan region.

Some sites were situated in the most urban and industrialized coastal cities of Canada, including the Vancouver metropolitan area (L3–7, L12, and L13; population ca. 2 400 000), Victoria, BC (L44 and 45); population ca. 360 000) on the west coast, and the Island of Montreal (S1–4; population ca. 3 600 000) and Quebec City, QC (S8–10 and S33–42; population ca. 700 000) on the east coast. Other sites were located in less densely populated areas, such as Saguenay, QC (S54–46; population ca. 100 000), or in remote regions, such as the shores of the outer St. Lawrence Estuary (S63). Population statistics were obtained from Statistics Canada (2021).

Table S1

Information on the passive air samples taken in Quebec and British Columbia: Geographical coordinates, deployment and retrieval date, deployment period, average temperature during the deployment period, population within a 20-km radius (NASA, 2015), and measured air concentrations of TBEC and BDE-47 in  $\text{pg}/\text{m}^3$ . Average temperature recordings are tabulated for sites used in temperature dependence and diffusive air-water gas exchange analyses.

| Site name     | Latitude  | Longitude  | Deployment date | Retrieval date | Deployment period (d) | Temperature (°C) | Population | $\alpha$ -TBEC | $\beta$ -TBEC | BDE-47 |
|---------------|-----------|------------|-----------------|----------------|-----------------------|------------------|------------|----------------|---------------|--------|
| <b>Quebec</b> |           |            |                 |                |                       |                  |            |                |               |        |
| S1            | 45.469155 | -73.800449 | 2021-10-14      | 2022-05-21     | 219                   |                  | 2156606    | 0.39           | 0.30          | 2.52   |
| S2            | 45.505762 | -73.543673 | 2019-11-25      | 2020-08-17     | 266                   |                  | 2595043    | 1.21           | 0.73          | 2.17   |
| S2_2          | 45.505762 | -73.543673 | 2020-08-17      | 2021-07-27     | 344                   |                  |            | 0.83           | 0.61          | 1.64   |
| S3            | 45.665733 | -73.533969 | 2019-11-25      | 2020-08-17     | 266                   |                  | 1919061    | 0.61           | 0.52          | 1.50   |
| S4            | 45.71537  | -73.428631 | 2019-11-25      | 2020-08-16     | 265                   |                  | 779009     | 0.23           | <LOD          | 1.64   |
| S5            | 46.047893 | -73.109854 | 2019-11-25      | 2020-08-16     | 265                   |                  | 73646      | 0.48           | <LOD          | 1.42   |
| S6            | 46.333255 | -72.554767 | 2019-11-24      | 2020-08-16     | 266                   |                  | 166537     | 0.24           | <LOD          | 1.28   |
| S6_2          | 46.333255 | -72.554767 | 2020-08-16      | 2021-07-27     | 345                   |                  |            | 0.19           | 0.26          | 0.70   |
| S7            | 46.386946 | -72.378962 | 2020-09-22      | 2021-07-27     | 308                   |                  | 147941     | <LOD           | <LOD          | <LOD   |
| S8            | 46.711971 | -71.190931 | 2019-11-24      | 2020-08-15     | 265                   |                  | 631572     | <LOD           | <LOD          | 2.15   |
| S8_2          | 46.711971 | -71.190931 | 2020-08-15      | 2021-07-28     | 347                   |                  |            | <LOD           | <LOD          | 1.53   |
| S9            | 46.805711 | -71.174908 | 2019-11-24      | 2020-08-15     | 265                   |                  | 733757     | 0.26           | 0.20          | 2.26   |
| S10           | 46.760038 | -71.18688  | 2019-11-24      | 2020-08-15     | 265                   |                  | 712517     | 0.19           | <LOD          | 1.02   |
| S10_2         | 46.760038 | -71.18688  | 2020-08-15      | 2021-07-28     | 347                   |                  |            | 0.12           | 0.18          | 1.02   |
| S11           | 46.986643 | -70.556641 | 2019-11-26      | 2020-08-14     | 262                   |                  | 19957      | <LOD           | <LOD          | 1.21   |
| S12           | 47.032257 | -70.455028 | 2019-11-26      | 2020-08-14     | 262                   |                  | 20322      | <LOD           | <LOD          | 0.63   |
| S13           | 47.10166  | -70.34451  | 2019-11-26      | 2020-08-14     | 262                   |                  | 14689      | <LOD           | <LOD          | 1.35   |
| S14           | 47.207559 | -70.257261 | 2019-11-26      | 2020-08-14     | 262                   |                  | 11461      | <LOD           | <LOD          | 0.63   |
| S15           | 47.369697 | -70.028755 | 2019-11-26      | 2020-08-13     | 261                   |                  | 14359      | <LOD           | <LOD          | 1.65   |
| S16           | 47.527509 | -69.802918 | 2019-11-26      | 2020-08-13     | 261                   |                  | 12300      | <LOD           | <LOD          | 1.06   |
| S17           | 47.823721 | -69.541425 | 2019-11-26      | 2020-08-13     | 261                   |                  | 32407      | 0.11           | <LOD          | 1.17   |
| S18           | 47.800518 | -69.468863 | 2019-11-26      | 2020-08-13     | 261                   |                  | 32877      | <LOD           | <LOD          | 0.83   |
| S18_2         | 47.800518 | -69.468863 | 2020-08-13      | 2021-07-26     | 347                   |                  |            | <LOD           | <LOD          | 0.86   |
| S19           | 48.128717 | -69.169932 | 2019-11-27      | 2020-08-13     | 260                   |                  | 9121       | <LOD           | <LOD          | 0.70   |
| S19_2         | 48.128717 | -69.169932 | 2020-08-13      | 2021-07-26     | 347                   |                  |            | <LOD           | <LOD          | 0.75   |
| S20           | 48.436658 | -68.516966 | 2019-11-27      | 2020-08-10     | 257                   |                  | 55712      | <LOD           | <LOD          | 1.30   |
| S21           | 48.464097 | -68.492452 | 2019-11-27      | 2020-08-10     | 257                   |                  | 55238      | 0.11           | <LOD          | 0.85   |
| S22           | 48.591288 | -68.184971 | 2019-11-27      | 2020-08-11     | 258                   |                  | 17606      | 0.18           | 0.14          | 0.82   |
| S23           | 48.84196  | -67.564692 | 2019-11-27      | 2020-08-11     | 258                   |                  | 17956      | 0.20           | <LOD          | <LOD   |
| S24           | 48.845968 | -67.507684 | 2019-11-27      | 2020-08-11     | 258                   |                  | 18321      | <LOD           | <LOD          | 0.96   |
| S25           | 49.095121 | -66.690157 | 2019-11-27      | 2020-08-11     | 258                   |                  | 8135       | <LOD           | 0.14          | 1.00   |
| S25_2         | 49.095121 | -66.690157 | 2020-08-11      | 2021-08-01     | 355                   |                  |            | <LOD           | <LOD          | 0.81   |
| S26           | 49.12794  | -66.480661 | 2019-11-28      | 2020-08-12     | 258                   |                  | 9330       | <LOD           | <LOD          | 1.00   |
| S26_2         | 49.12794  | -66.480661 | 2021-08-02      | 2022-05-06     | 277                   |                  |            | 0.67           | 0.53          | <LOD   |
| S27           | 49.118923 | -66.47789  | 2021-08-02      | 2022-05-06     | 277                   |                  | 9333       | <LOD           | <LOD          | <LOD   |
| S28           | 49.013853 | -66.394871 | 2021-08-02      | 2022-05-06     | 277                   |                  | 7333       | <LOD           | <LOD          | <LOD   |
| S29           | 48.970136 | -66.162999 | 2021-08-02      | 2022-05-06     | 277                   |                  | 344        | <LOD           | <LOD          | <LOD   |
| S30           | 48.439206 | -66.02294  | 2021-08-02      | 2022-05-06     | 277                   |                  | 180        | <LOD           | <LOD          | <LOD   |
| S31           | 48.150858 | -65.8442   | 2021-08-02      | 2022-05-06     | 277                   |                  | 11847      | <LOD           | <LOD          | <LOD   |
| S32           | 49.203244 | -66.167248 | 2019-11-28      | 2020-08-12     | 258                   |                  | 2154       | <LOD           | <LOD          | <LOD   |
| S32_2         | 49.203244 | -66.167248 | 2020-08-12      | 2021-08-01     | 354                   |                  |            | <LOD           | <LOD          | <LOD   |
| S33           | 46.854722 | -71.315556 | 2019-11-24      | 2020-08-18     | 268                   |                  | 743965     | 0.12           | 0.34          | 1.10   |
| S34           | 46.774955 | -71.287295 | 2019-11-25      | 2020-09-24     | 304                   |                  | 744469     | 0.44           | 0.37          | 1.06   |
| S35           | 46.838333 | -71.213333 | 2019-11-25      | 2020-08-19     | 268                   |                  | 734119     | 0.29           | <LOD          | 1.67   |
| S35_2         | 46.838333 | -71.213333 | 2020-08-19      | 2021-07-28     | 343                   |                  |            | 0.13           | <LOD          | 0.72   |
| S36           | 46.845162 | -71.207898 | 2021-07-28      | 2022-05-02     | 278                   |                  | 733503     | 0.37           | 0.18          | 0.66   |
| S37           | 46.82762  | -71.217761 | 2021-07-28      | 2022-05-02     | 278                   |                  | 741534     | 0.82           | 0.99          | 1.04   |
| S38           | 46.837912 | -71.202403 | 2021-07-28      | 2022-05-02     | 278                   |                  | 732965     | 0.54           | 0.47          | 0.72   |
| S39           | 46.832376 | -71.227689 | 2021-07-28      | 2022-05-02     | 278                   |                  | 739729     | 0.53           | 0.47          | 0.78   |

|       |           |            |            |            |     |        |      |      |      |
|-------|-----------|------------|------------|------------|-----|--------|------|------|------|
| S40   | 46.820679 | -71.215028 | 2021-07-28 | 2022-05-02 | 278 | 747332 | 0.63 | 0.48 | 0.80 |
| S41   | 46.885    | -71.161667 | 2019-11-25 | 2020-08-19 | 268 | 663439 | <LOD | 0.15 | 2.00 |
| S42   | 46.91182  | -71.093094 | 2019-11-25 | 2020-08-20 | 269 | 479747 | 0.20 | <LOD | 1.03 |
| S43   | 47.020833 | -70.927778 | 2019-11-25 | 2020-08-20 | 269 | 33302  | 0.11 | 0.17 | 1.07 |
| S43_2 | 47.02268  | -70.927039 | 2021-07-28 | 2022-05-02 | 278 |        | 0.22 | 0.75 | 1.10 |
| S44   | 47.045278 | -70.883056 | 2019-11-25 | 2020-08-20 | 269 | 25802  | <LOD | <LOD | 1.44 |
| S45   | 47.445193 | -70.488035 | 2019-11-26 | 2020-08-21 | 269 | 12877  | <LOD | <LOD | 0.94 |
| S46   | 47.655946 | -70.143002 | 2019-11-26 | 2020-08-21 | 269 | 14453  | 0.15 | <LOD | 1.14 |
| S47   | 47.697467 | -70.226313 | 2019-11-26 | 2020-08-21 | 269 | 15173  | <LOD | <LOD | 1.07 |
| S48   | 48.551334 | -71.644332 | 2019-11-27 | 2020-08-22 | 269 | 48382  | <LOD | <LOD | 6.10 |
| S48_2 | 48.551334 | -71.644332 | 2020-08-22 | 2021-07-30 | 342 |        | <LOD | <LOD | 0.60 |
| S49   | 48.523285 | -71.655464 | 2019-11-27 | 2020-08-22 | 269 | 50440  | <LOD | <LOD | 1.12 |
| S50   | 48.575821 | -71.69414  | 2021-07-30 | 2022-05-03 | 277 | 45685  | 0.18 | 0.18 | <LOD |
| S51   | 48.558106 | -71.654878 | 2021-07-30 | 2022-05-03 | 277 | 47839  | 0.41 | 0.43 | <LOD |
| S52   | 48.566261 | -71.653343 | 2021-07-30 | 2022-05-03 | 277 | 46623  | 0.52 | 0.68 | <LOD |
| S53   | 48.561596 | -71.64784  | 2021-07-30 | 2022-05-03 | 277 | 47875  | 0.16 | 0.32 | <LOD |
| S54   | 48.433506 | -71.237773 | 2019-11-27 | 2020-08-22 | 269 | 136328 | <LOD | <LOD | 1.68 |
| S54_2 | 48.433506 | -71.237773 | 2020-08-22 | 2021-07-29 | 341 |        | <LOD | <LOD | <LOD |
| S55   | 48.419938 | -71.208286 | 2019-11-27 | 2020-08-23 | 270 | 137601 | <LOD | <LOD | 0.76 |
| S56   | 48.41706  | -71.064918 | 2019-11-27 | 2020-08-23 | 270 | 149037 | 0.19 | <LOD | 0.96 |
| S57   | 48.141483 | -69.699112 | 2019-11-29 | 2020-08-24 | 269 | 3198   | <LOD | <LOD | 0.98 |
| S58   | 48.344593 | -69.410547 | 2019-11-29 | 2020-08-24 | 269 | 2829   | <LOD | 0.22 | 1.03 |
| S59   | 48.73751  | -69.0827   | 2019-11-29 | 2020-08-24 | 269 | 4377   | <LOD | <LOD | <LOD |
| S60   | 48.936019 | -68.656616 | 2019-11-30 | 2021-07-30 | 608 | 3306   | <LOD | <LOD | <LOD |
| S61   | 49.191401 | -68.264497 | 2019-11-30 | 2020-08-25 | 269 | 27138  | <LOD | <LOD | 1.16 |
| S62   | 49.237981 | -68.142384 | 2019-11-30 | 2020-08-25 | 269 | 23863  | <LOD | 0.16 | <LOD |
| S62_2 | 49.237981 | -68.142384 | 2020-08-25 | 2021-07-31 | 340 |        | <LOD | <LOD | <LOD |
| S63   | 49.415035 | -67.311237 | 2019-12-01 | 2020-08-25 | 268 | 458    | <LOD | <LOD | 0.59 |
| S64   | 50.031046 | -66.823474 | 2019-12-01 | 2020-08-25 | 268 | 7002   | <LOD | <LOD | 0.72 |
| S65   | 50.154989 | -66.54716  | 2021-07-31 | 2022-05-04 | 277 | 26023  | 0.23 | 0.33 | <LOD |
| S66   | 50.220751 | -66.363786 | 2019-12-01 | 2020-08-26 | 269 | 28021  | <LOD | <LOD | 0.96 |
| S66_2 | 50.220751 | -66.363786 | 2020-08-26 | 2021-07-31 | 339 |        | <LOD | <LOD | <LOD |
| S67   | 50.2249   | -66.406352 | 2021-07-31 | 2022-05-04 | 277 | 28023  | 0.43 | 0.50 | <LOD |
| S68   | 50.204196 | -66.363854 | 2021-07-31 | 2022-05-04 | 277 | 28061  | 0.65 | 0.58 | <LOD |
| S69   | 50.212716 | -66.312511 | 2021-07-31 | 2022-05-04 | 277 | 27614  | 0.16 | <LOD | <LOD |
| S70   | 50.216136 | -66.262451 | 2021-07-31 | 2022-05-04 | 277 | 27602  | 0.50 | 0.37 | <LOD |
| S71   | 50.206686 | -66.353095 | 2021-07-31 | 2022-05-04 | 277 | 27892  | <LOD | <LOD | <LOD |

### British Columbia

|      |           |             |            |            |     |      |         |      |      |      |
|------|-----------|-------------|------------|------------|-----|------|---------|------|------|------|
| L1   | 49.29467  | -122.860722 | 2020-03-04 | 2020-08-18 | 167 | 13.3 | 1635872 | 1.58 | 1.21 | 5.18 |
| L1_2 | 49.2946   | -122.860722 | 2020-08-18 | 2021-03-26 | 220 | 8.3  |         | 1.12 | 0.92 | 1.58 |
| L1_3 | 49.2946   | -122.860722 | 2021-03-26 | 2021-08-16 | 143 | 15.2 |         | 1.98 | 2.12 | 5.02 |
| L2   | 49.314809 | -122.916119 | 2021-05-17 | 2021-12-03 | 200 | 14.6 | 1603159 | 0.82 | 0.53 | 1.26 |
| L3   | 49.27724  | -122.92025  | 2020-01-23 | 2020-06-17 | 146 | 6.5  | 1875070 | 0.65 | 0.63 | 2.38 |
| L3_2 | 49.27724  | -122.92025  | 2020-06-17 | 2020-11-20 | 156 | 13.9 |         | 0.98 | 0.70 | 4.90 |
| L3_3 | 49.27724  | -122.92025  | 2020-11-20 | 2021-04-29 | 160 | 6.0  |         | 0.44 | 0.39 | 2.72 |
| L3_4 | 49.27724  | -122.92025  | 2021-04-29 | 2022-04-04 | 185 | 5.7  |         | 0.34 | 0.25 | 2.32 |
| L4   | 49.277425 | -122.92093  | 2020-06-17 | 2020-11-20 | 156 | 13.9 | 1892985 | 0.78 | 0.57 | 2.60 |
| L4_2 | 49.277425 | -122.92093  | 2020-11-20 | 2021-04-29 | 160 | 6.0  |         | 0.58 | 0.43 | 2.13 |
| L4_3 | 49.2774   | -122.92093  | 2021-04-29 | 2021-10-01 | 155 | 16.7 |         | 0.61 | 0.66 | 2.13 |
| L4_4 | 49.277425 | -122.92093  | 2021-10-01 | 2022-04-04 | 185 | 5.7  |         | 0.41 | 0.23 | 1.78 |
| L5   | 49.27742  | -122.92093  | 2020-06-17 | 2020-11-20 | 156 | 13.9 | 1892985 | 0.70 | 0.55 | 2.26 |
| L5_2 | 49.27742  | -122.92093  | 2020-11-20 | 2021-04-29 | 160 | 6.0  |         | 0.43 | 0.43 | 2.24 |
| L5_3 | 49.2771   | -122.92099  | 2021-04-29 | 2021-10-01 | 155 | 16.7 |         | 0.58 | 0.70 | 1.44 |
| L5_4 | 49.27742  | -122.92093  | 2021-10-01 | 2022-04-04 | 185 | 5.7  |         | 0.49 | 0.65 | 2.13 |
| L6   | 49.249106 | -122.954593 | 2021-05-12 | 2021-12-04 | 206 | 14.4 | 2012036 | 0.78 | 0.65 | 2.31 |
| L7   | 49.28514  | -123.05381  | 2021-05-03 | 2021-10-03 | 153 | 16.7 | 1695810 | 2.20 | 1.59 | 5.46 |
| L7_2 | 49.28514  | -123.05381  | 2021-10-03 | 2022-04-06 | 185 | 5.7  |         | 0.61 | 0.54 | 0.92 |
| L8   | 49.35072  | -123.089058 | 2020-02-16 | 2020-10-16 | 243 | 12.3 | 1196091 | 0.63 | 0.34 | 1.74 |
| L9   | 49.327892 | -123.12952  | 2021-05-25 | 2021-12-03 | 192 | 14.7 | 1260721 | 0.77 | 0.55 | 2.57 |
| L10  | 49.3398   | -123.2333   | 2020-10-05 | 2021-05-14 | 221 | 7.0  | 911872  | 0.57 | 0.54 | 3.67 |

|         |           |              |            |            |     |      |         |      |      |       |
|---------|-----------|--------------|------------|------------|-----|------|---------|------|------|-------|
| L10_2   | 49.3398   | -123.2333    | 2021-05-14 | 2021-12-03 | 203 | 14.6 |         | 1.23 | 1.15 | 1.45  |
| L11     | 49.377486 | -123.332887  | 2021-05-15 | 2021-12-05 | 204 | 14.6 | 357701  | 1.05 | 0.78 | 1.33  |
| L12     | 49.278051 | -123.231074  | 2021-05-26 | 2021-12-04 | 192 | 14.7 | 1184810 | 0.71 | 0.63 | 1.01  |
| L13     | 49.22104  | -123.20958   | 2020-06-23 | 2020-11-16 | 146 | 14.7 | 1286814 | 1.14 | 0.88 | 3.38  |
| L13_2   | 49.22104  | -123.20958   | 2020-11-16 | 2021-05-04 | 169 | 6.0  |         | 0.56 | 0.68 | 0.97  |
| L13_3   | 49.22104  | -123.20958   | 2021-05-04 | 2021-12-04 | 214 | 14.4 |         | 0.76 | 0.80 | 1.65  |
| L14     | 49.080669 | -123.130664  | 2021-06-03 | 2021-12-05 | 185 | 14.7 | 929072  | 1.29 | 1.11 | 3.53  |
| L15     | 49.07119  | -123.019187  | 2020-05-08 | 2020-09-29 | 144 | 16.2 | 1226050 | 0.59 | 0.46 | 1.96  |
| L16     | 49.096479 | -123.0120251 | 2021-08-24 | 2022-02-24 | 184 | 7.0  | 1573731 | 0.44 | <LOD | 2.11  |
| L17     | 49.11788  | -123.07748   | 2021-05-04 | 2021-12-04 | 214 | 14.4 | 1562783 | 0.34 | 0.24 | 2.50  |
| L18     | 49.14582  | -123.0198175 | 2021-08-24 | 2022-02-24 | 184 | 7.0  | 1865239 | 0.68 | 0.65 | 0.90  |
| L19     | 49.107833 | -122.872199  | 2021-06-30 | 2022-01-21 | 205 | 10.8 | 1509064 | 0.58 | 0.47 | 1.00  |
| L20     | 49.199489 | -122.8991932 | 2021-08-24 | 2022-02-24 | 184 | 7.0  | 2068510 | 0.44 | 0.28 | 1.25  |
| L21     | 49.234653 | -122.800053  | 2021-05-12 | 2021-12-16 | 218 | 13.6 | 1509339 | 0.95 | 0.73 | 3.02  |
| L22     | 49.1958   | -122.72716   | 2021-05-06 | 2021-12-16 | 224 | 13.6 | 1264596 | 0.63 | 0.57 | 2.07  |
| L23     | 49.20579  | -122.60346   | 2021-05-06 | 2021-12-16 | 224 | 13.6 | 778091  | 0.62 | 0.55 | 1.65  |
| L24     | 49.18588  | -122.58501   | 2021-05-06 | 2021-12-16 | 224 | 13.6 | 744309  | 0.23 | 0.27 | 1.08  |
| L25     | 49.167454 | -122.474923  | 2021-06-03 | 2021-12-16 | 196 | 14.7 | 439299  | 0.57 | 0.32 | 2.16  |
| L26     | 49.210922 | -122.507831  | 2021-05-12 | 2021-12-03 | 205 | 14.4 | 436915  | 0.33 | 0.17 | 1.21  |
| L27     | 49.298214 | -122.703625  | 2021-06-04 | 2021-12-03 | 182 | 14.7 | 802039  | 0.80 | 0.52 | 1.65  |
| L28     | 49.377252 | -122.889298  | 2021-05-17 | 2021-12-03 | 200 | 14.6 | 987976  | 0.87 | 0.63 | 1.62  |
| L29     | 49.03365  | -122.65477   | 2021-05-04 | 2021-12-04 | 214 | 14.4 | 648376  | 0.31 | 0.20 | 1.40  |
| L30     | 49.143885 | -122.070985  | 2021-08-27 | 2022-02-28 | 185 | 7.0  | 202088  | 0.18 | <LOD | 1.02  |
| L31     | 49.24474  | -121.681236  | 2020-02-27 | 2020-10-10 | 226 | 13.7 | 32557   | <LOD | <LOD | 1.02  |
| L31_2   | 49.24474  | -121.681236  | 2020-10-10 | 2021-06-18 | 251 | 8.0  |         | 0.17 | <LOD | <LOD  |
| L31_3   | 49.24474  | -121.681236  | 2021-06-18 | 2022-03-13 | 268 | 10.3 |         | <LOD | <LOD | <LOD  |
| L32     | 49.31884  | -121.420888  | 2020-02-15 | 2020-10-10 | 238 | 12.3 | 7565    | <LOD | <LOD | 1.26  |
| L32_2   | 49.31884  | -121.420888  | 2021-05-23 | 2022-04-30 | 342 | 10.3 |         | <LOD | <LOD | <LOD  |
| L33     | 50.76738  | -120.958617  | 2020-02-27 | 2020-10-09 | 225 | 13.7 | 1428    | 0.21 | 0.19 | 1.02  |
| L34     | 51.51144  | -120.759003  | 2020-05-23 | 2020-10-13 | 143 | 15.6 | 1438    | <LOD | <LOD | 0.62  |
| L34_2   | 51.51144  | -120.759003  | 2020-10-13 | 2021-05-20 | 219 | 7.4  |         | 0.14 | 0.21 | <LOD  |
| L34_3   | 51.51144  | -120.759003  | 2021-05-20 | 2021-10-10 | 143 | 17.0 |         | 0.34 | 0.34 | 10.24 |
| L35     | 49.70542  | -123.116055  | 2020-02-28 | 2020-09-22 | 207 | 13.7 | 19253   | 0.40 | 0.29 | 1.05  |
| L36     | 49.41939  | -123.637475  | 2020-02-18 | 2020-10-17 | 242 | 12.3 | 26645   | 0.32 | 0.18 | 1.12  |
| L36_2   | 49.41939  | -123.637475  | 2020-10-07 | 2021-05-21 | 226 | 7.4  |         | <LOD | 0.21 | 0.65  |
| L37     | 49.92998  | -124.67645   | 2020-02-21 | 2020-08-04 | 165 | 12.3 | 15575   | 0.27 | <LOD | 0.64  |
| L38     | 49.6914   | -124.9178    | 2020-06-07 | 2020-11-15 | 161 | 14.8 | 60955   | 0.27 | 0.28 | 1.10  |
| L39     | 49.4673   | -124.7299    | 2020-05-24 | 2020-10-25 | 154 | 15.6 | 9653    | 0.48 | 0.15 | 1.64  |
| L39_2   | 49.4673   | -124.7299    | 2020-10-25 | 2021-06-02 | 220 | 7.4  |         | 0.16 | 0.26 | 0.83  |
| L39_3   | 49.4673   | -124.7299    | 2021-06-02 | 2022-01-21 | 233 | 11.7 |         | 0.20 | 0.26 | 1.36  |
| L40     | 49.47106  | -124.188079  | 2020-06-20 | 2021-01-29 | 223 | 11.3 | 17248   | 0.25 | 0.32 | 1.64  |
| L40_2   | 49.47106  | -124.188079  | 2021-01-29 | 2021-10-01 | 245 | 12.9 |         | 0.26 | 0.26 | <LOD  |
| L41     | 49.0787   | -123.70913   | 2020-04-14 | 2021-02-18 | 310 | 11.4 | 53069   | 0.39 | 0.38 | 1.46  |
| L41_2   | 49.0787   | -123.70913   | 2021-02-18 | 2021-09-07 | 201 | 12.5 |         | 0.45 | 0.87 | <LOD  |
| L42     | 48.8983   | -123.34592   | 2020-07-12 | 2021-04-18 | 280 | 9.9  | 15431   | 0.29 | 0.41 | 0.84  |
| L42_2   | 48.8983   | -123.34592   | 2021-04-18 | 2021-12-01 | 227 | 14.1 |         | 0.35 | 0.34 | 0.75  |
| L43     | 48.7753   | -123.12827   | 2020-05-28 | 2020-10-11 | 136 | 16.9 | 8251    | 0.16 | <LOD | 1.77  |
| L43_a_1 | 48.7753   | -123.12827   | 2020-07-02 | 2021-04-03 | 275 | 9.9  |         | 0.19 | <LOD | <LOD  |
| L43_a_2 | 48.7753   | -123.12827   | 2021-04-03 | 2021-11-26 | 237 | 13.8 |         | 0.23 | 0.17 | 0.60  |
| L43_b_1 | 48.7753   | -123.12827   | 2020-07-02 | 2021-04-03 | 275 | 9.9  |         | 0.18 | <LOD | 0.73  |
| L43_b_2 | 48.7753   | -123.12827   | 2021-04-03 | 2021-11-26 | 237 | 13.8 |         | 0.26 | 0.51 | 0.79  |
| L43_c_1 | 48.7753   | -123.12827   | 2020-07-02 | 2021-04-03 | 275 | 9.9  |         | 0.14 | 0.17 | 0.81  |
| L43_c_2 | 48.7753   | -123.12827   | 2021-04-03 | 2021-11-26 | 237 | 13.8 |         | 0.15 | 0.13 | 0.84  |
| L44     | 48.421    | -123.3049    | 2020-05-06 | 2020-10-04 | 151 | 16.2 | 314981  | 0.73 | 0.57 | 2.30  |
| L44_2   | 48.421    | -123.3049    | 2020-10-04 | 2021-05-29 | 237 | 7.4  |         | 0.27 | 0.28 | 1.59  |
| L44_3   | 48.421    | -123.30      | 2021-05-29 | 2021-10-08 | 132 | 17.8 |         | 0.50 | 0.30 | 1.20  |
| L45     | 48.4406   | -123.3054    | 2020-04-13 | 2020-10-03 | 173 | 15.1 | 317955  | 1.49 | 1.13 | 6.49  |
| L45_2   | 48.4406   | -123.3054    | 2020-10-03 | 2021-05-29 | 238 | 7.4  |         | 0.51 | 0.50 | 1.48  |
| L45_3   | 48.4406   | -123.3054    | 2021-05-29 | 2021-10-10 | 134 | 17.8 |         | 0.89 | 0.72 | 1.98  |
| L46     | 48.57619  | -124.407916  | 2020-10-23 | 2021-08-04 | 285 | 9.5  | 255     | 0.25 | <LOD | 0.76  |
| L47     | 48.83573  | -125.135358  | 2020-10-27 | 2021-06-23 | 239 | 8.3  | 251     | 0.24 | 0.20 | 3.03  |

Table S2 Information on the active air sampling (AAS) on Saturna Island, BC, Tadoussac, QC, and Toronto, ON: The start date of each collection period, the air concentrations in  $\mu\text{g}/\text{m}^3$  of TBECH and BDE-47 in the gas phase, the average sea surface temperature (SST in  $^{\circ}\text{C}$ ), the average air temperature (AAT in  $^{\circ}\text{C}$ ), and the CO air concentration in  $\mu\text{g}/\text{m}^3$  predicted by FLEXPART.

| Start Date                | $\alpha$ -TBECH | $\beta$ -TBECH | BDE-47 | SST <sup>a</sup> | AAT <sup>b</sup> | Predicted CO |
|---------------------------|-----------------|----------------|--------|------------------|------------------|--------------|
| <b>Saturna Island, BC</b> |                 |                |        |                  |                  |              |
| 2019-12-18                | <LOD            | <LOD           | 0.61   | 6.1              | 10.5             | 4.16         |
| 2020-01-17                | 0.06            | <LOD           | 0.39   | 2.2              | 9.0              | 2.12         |
| 2020-02-14                | 0.06            | 0.04           | 0.23   | 4.9              | 8.6              | 1.26         |
| 2020-03-15                | 0.13            | 0.07           | <LOD   | 3.8              | 8.3              | 3.01         |
| 2020-05-11                | 0.06            | 0.04           | 0.87   | 15.4             | 10.8             | 3.50         |
| 2020-06-11                | <LOD            | <LOD           | 1.08   | 13.7             | 12.4             | 2.18         |
| 2020-07-08                | <LOD            | <LOD           | 0.92   | 14.0             | 13.9             | 0.66         |
| 2020-08-06                | 0.13            | 0.12           | 0.57   | 18.3             | 16.5             | 0.81         |
| 2020-09-05                | 0.11            | 0.05           | 0.58   | 14.6             | 16.5             | 2.21         |
| 2020-10-03                | 0.11            | <LOD           | 0.41   | 13.3             | 15.8             | 6.00         |
| 2020-11-01                | 0.10            | 0.06           | 0.30   | 9.2              | 13.6             | 7.11         |
| <b>Tadoussac, QC</b>      |                 |                |        |                  |                  |              |
| 2020-12-18                | 0.09            | 0.05           | 0.13   | 0.2              | -10.0            | 2.3          |
| 2021-01-16                | 0.04            | 0.02           | <LOD   | -0.3             | -2.0             | 5.63         |
| 2021-02-14                | <LOD            | <LOD           | <LOD   | -0.7             | -11.8            | 1.48         |
| 2021-03-13                | 0.02            | <LOD           | <LOD   | 0.0              | -11.8            | 1.18         |
| 2021-04-14                | 0.05            | 0.02           | 0.06   | 4.0              | 4.3              | 1.57         |
| 2021-05-15                | 0.10            | <LOD           | 0.10   | 7.0              | 6.8              | 2.00         |
| 2021-06-13                | 0.23            | 0.15           | 0.20   | 10.4             | 11.0             | 1.37         |
| 2021-07-12                | 0.29            | 0.17           | 0.61   | 12.5             | 15.8             | 1.01         |
| 2021-08-10                | 0.22            | 0.13           | 0.39   | 12.8             | 18.0             | 5.40         |
| 2021-09-08                | 0.08            | 0.06           | 0.69   | 12.7             | 14.0             | 4.68         |
| 2021-10-07                | <LOD            | <LOD           | 0.33   | 10.4             | 11.0             | 1.94         |
| 2021-11-05                | 0.14            | 0.07           | <LOD   | 7.6              | 3.8              | 2.12         |
| <b>Toronto, ON</b>        |                 |                |        |                  |                  |              |
| 2020-06-17                | 0.80            | 0.56           | 5.26   |                  | 25.2             | 7.20         |
| 2020-06-24                | 0.75            | 0.55           | 6.20   |                  | 25.2             | 4.37         |
| 2020-07-01                | 0.69            | 0.46           | 3.96   |                  | 29.2             | 4.60         |
| 2020-07-08                | 0.68            | 0.37           | 9.26   |                  | 27.0             | 5.04         |
| 2020-07-15                | 0.63            | 0.49           | 4.09   |                  | 26.3             | 4.98         |
| 2020-07-22                | 1.34            | 0.87           | 4.05   |                  | 27.0             | 4.43         |
| 2020-07-29                | 0.30            | 0.19           | 1.40   |                  | 24.9             | 5.06         |
| 2020-08-05                | 0.80            | 0.48           | 4.49   |                  | 25.4             | 5.26         |
| 2020-08-12                | 0.36            | 0.26           | 1.27   |                  | 24.5             | 5.08         |



|            |      |      |      |      |       |
|------------|------|------|------|------|-------|
| 2020-08-19 | 0.78 | 0.56 | 3.16 | 26.5 | 5.56  |
| 2020-08-26 | 0.45 | 0.25 | 1.56 | 23.4 | 4.96  |
| 2020-09-02 | 0.54 | 0.34 | 2.31 | 20.8 | 4.76  |
| 2020-09-09 | 0.33 | 0.17 | 1.03 | 19.1 | 5.62  |
| 2020-09-16 | 0.43 | 0.26 | 2.02 | 17.4 | 6.27  |
| 2020-09-23 | 0.54 | 0.36 | 1.45 | 21.1 | 7.39  |
| 2020-09-30 | 0.35 | 0.22 | 0.97 | 15.0 | 4.81  |
| 2020-10-07 | 0.30 | 0.20 | 0.93 | 14.7 | 4.52  |
| 2020-10-14 | 0.23 | 0.20 | 0.90 | 12.6 | 5.56  |
| 2020-10-21 | 0.19 | 0.14 | 0.50 | 10.8 | 6.41  |
| 2020-10-28 | 0.22 | 0.14 | 0.41 | 7.2  | 5.04  |
| 2020-11-04 | 0.61 | 0.57 | 1.06 | 14.7 | 7.42  |
| 2020-11-11 | 0.22 | 0.12 | 0.40 | 7.2  | 5.28  |
| 2020-11-18 | 0.22 | 0.13 | 0.29 | 6.8  | 5.91  |
| 2020-11-25 | 0.27 | 0.19 | 0.75 | 6.6  | 6.88  |
| 2020-12-02 | 0.23 | 0.14 | 0.33 | 2.5  | 4.52  |
| 2020-12-09 | 0.25 | 0.20 | 0.43 | 3.3  | 6.18  |
| 2020-12-16 | 0.30 | 0.21 | 0.51 | 1.9  | 6.62  |
| 2020-12-23 | 0.29 | 0.22 | 0.46 | 2.2  | 4.08  |
| 2020-12-30 | 0.31 | 0.21 | 0.27 | 2.8  | 10.36 |
| 2021-01-06 | 0.29 | 0.18 | 0.31 | 1.5  | 6.25  |
| 2021-01-13 | 0.33 | 0.22 | 0.47 | 3.1  | 6.60  |
| 2021-01-20 | 0.25 | 0.17 | 0.27 | 0.4  | 4.65  |
| 2021-01-27 | 0.18 | 0.11 | 0.48 | -2.7 | 3.62  |
| 2021-02-03 | 0.26 | 0.14 | 0.37 | -1.9 | 5.00  |
| 2021-02-10 | 0.20 | 0.11 | 0.16 | -3.9 | 4.45  |
| 2021-02-17 | 0.36 | 0.24 | 0.41 | 0.1  | 6.56  |
| 2021-02-24 | 0.21 | 0.14 | 0.35 | 2.5  | 5.26  |
| 2021-03-03 | 0.29 | 0.18 | 0.57 | 2.4  | 4.88  |
| 2021-03-10 | 0.21 | 0.11 | 0.42 | 5.1  | 4.63  |
| 2021-03-17 | 0.44 | 0.25 | 0.71 | 8.0  | 6.20  |
| 2021-03-24 | 0.27 | 0.14 | 0.63 | 9.5  | 5.21  |
| 2021-03-31 | 0.28 | 0.15 | 0.61 | 9.3  | 6.06  |
| 2021-04-07 | 0.19 | 0.15 | 0.69 | 12.9 | 7.72  |
| 2021-04-14 | 0.32 | 0.22 | 0.58 | 10.9 | 3.39  |
| 2021-04-21 | 0.27 | 0.19 | 0.31 | 12.9 | 5.72  |
| 2021-04-28 | 0.25 | 0.16 | 0.96 | 11.6 | 6.10  |
| 2021-05-05 | 0.25 | 0.15 | 0.41 | 12.6 | 2.43  |
| 2021-05-12 | 0.80 | 0.51 | 1.65 | 19.7 | 6.14  |

<sup>a</sup> SST values were taken from the NOAA CoastWatch/OceanWatch database (ACSPO Global SST from AHI).

<sup>b</sup> AAT values were provided by Saturna CAPMON, Pointe de l'Islet, and University of Toronto Scarborough for sites on Saturna Island, Tadoussac, and Toronto, respectively.

Table S3 Information of precipitation sampling: Precipitation concentrations and wet deposition fluxes of TBECH and BDE-47 in pg/L and pg/m<sup>2</sup>/day, respectively, collected in Saturna Island, BC and in Tadoussac, QC.

| Start Date                | End Date   | Concentration (pg/L) |                |        | Wet deposition flux (pg/m <sup>2</sup> /day) |                |        |
|---------------------------|------------|----------------------|----------------|--------|----------------------------------------------|----------------|--------|
|                           |            | $\alpha$ -TBECH      | $\beta$ -TBECH | BDE-47 | $\alpha$ -TBECH                              | $\beta$ -TBECH | BDE-47 |
| <b>Saturna Island, BC</b> |            |                      |                |        |                                              |                |        |
| 2019-12-18                | 2020-01-17 | 51                   | 45             | 102    | 181                                          | 159            | 361    |
| 2020-01-17                | 2020-02-14 | 115                  | 97             | 69     | 779                                          | 657            | 468    |
| 2020-02-14                | 2020-03-15 | 681                  | 561            | 19     | 2099                                         | 1731           | 58     |
| 2020-03-15                | 2020-04-15 | 708                  | 588            | 36     | 1048                                         | 870            | 53     |
| 2020-04-15                | 2020-05-11 | 236                  | 191            | 14     | 351                                          | 285            | 21     |
| 2020-05-11                | 2020-06-11 | 55                   | 48             | 10     | 84                                           | 72             | 15     |
| 2020-06-11                | 2020-07-08 | 231                  | 176            | 12     | 277                                          | 211            | 14     |
| 2020-07-08                | 2020-08-06 | 1416                 | 1125           | <LOD   | 1035                                         | 823            | <LOD   |
| 2020-08-06                | 2020-09-04 | 1150                 | 943            | 23     | 991                                          | 813            | 20     |
| 2020-09-05                | 2020-10-03 | 718                  | 589            | 21     | 1439                                         | 1181           | 42     |
| 2020-10-03                | 2020-11-01 | 67                   | 54             | 50     | 207                                          | 167            | 156    |
| 2020-11-01                | 2020-12-01 | 141                  | 113            | 44     | 615                                          | 491            | 192    |
| <b>Tadoussac, QC</b>      |            |                      |                |        |                                              |                |        |
| 2020-12-18                | 2021-01-16 | 67                   | 51             | 90     | 114                                          | 87             | 153    |
| 2021-01-16                | 2021-02-14 | 12                   | 12             | 58     | 19                                           | 19             | 92     |
| 2021-02-14                | 2021-03-13 | 22                   | 19             | 64     | 28                                           | 25             | 82     |
| 2021-03-13                | 2021-04-14 | 189                  | 151            | 25     | 283                                          | 226            | 38     |
| 2021-04-14                | 2021-05-15 | 289                  | 224            | 26     | 628                                          | 487            | 56     |
| 2021-05-15                | 2021-06-13 | 302                  | 251            | 45     | 197                                          | 163            | 29     |
| 2021-06-13                | 2021-07-12 | 34                   | 29             | 22     | 96                                           | 82             | 63     |
| 2021-07-12                | 2021-08-10 | 116                  | 95             | 43     | 177                                          | 144            | 66     |
| 2021-08-10                | 2021-09-08 | 72                   | 49             | 32     | 44                                           | 30             | 19     |
| 2021-09-08                | 2021-10-07 | 24                   | 20             | 30     | 78                                           | 64             | 96     |
| 2021-10-07                | 2021-11-05 | 11                   | 11             | 27     | 36                                           | 35             | 89     |

Table S4 Detection frequencies (DFs), LODs, and LOQs of the target brominated/halogenated flame retardants in the passive air samplers and passive water samplers. The LODs and LOQs of each compound are in ng/sample.

| Compound        | PAS    |       |       | PWS    |       |       |
|-----------------|--------|-------|-------|--------|-------|-------|
|                 | DF (%) | LOD   | LOQ   | DF (%) | LOD   | LOQ   |
| BDE-17          | 5      | 0.005 | 0.02  | 79     | 0.005 | 0.02  |
| BDE-28          | 3      | 0.01  | 0.04  | 77     | 0.01  | 0.03  |
| BDE-49          | 0      | 0.06  | 0.19  | 0      | 1.29  | 4.32  |
| BDE-66          | 1      | 0.04  | 0.13  | 23     | 0.03  | 0.09  |
| BDE-71          | 0      | 0.04  | 0.12  | 0      | 0.88  | 2.94  |
| BDE-85          | 8      | 0.09  | 0.29  | 0      | 0.09  | 0.29  |
| BDE-99          | 4      | 0.07  | 0.23  | 85     | 0.04  | 0.14  |
| BDE-100         | 0      | 0.19  | 0.62  | 77     | 0.01  | 0.02  |
| BDE-138         | 0      | 0.07  | 0.25  | 0      | 0.06  | 0.20  |
| BDE-153         | 0      | 0.07  | 0.24  | 15     | 0.04  | 0.12  |
| BDE-154         | 1      | 0.01  | 0.04  | 27     | 0.01  | 0.04  |
| BDE-183         | 0      | 0.03  | 0.10  | 4      | 0.02  | 0.05  |
| BDE-190         | 26     | 0.09  | 0.29  | 8      | 0.04  | 0.14  |
| BDE-209         | 1      | 0.19  | 0.63  | 13     | 0.18  | 0.59  |
| ATE             | 5      | 0.06  | 0.20  | 0      | 0.05  | 0.16  |
| BATE            | 0      | 0.03  | 0.09  | 0      | 0.03  | 0.09  |
| PBBz            | 7      | 0.03  | 0.08  | 0      | 0.03  | 0.08  |
| PBT             | 0      | 0.06  | 0.19  | 0      | 0.06  | 0.19  |
| PBEB            | 0      | 0.05  | 0.17  | 0      | 0.05  | 0.17  |
| DBTE            | 0      | 0.03  | 0.09  | 0      | 0.03  | 0.09  |
| HBBz            | 7      | 0.11  | 0.35  | 0      | 0.11  | 0.35  |
| EHTBB           | 0      | 0.11  | 0.36  | 0      | 0.11  | 0.36  |
| BTBPE           | 0      | 0.14  | 0.47  | 0      | 0.14  | 0.47  |
| BEHTBP          | 1      | 0.17  | 0.56  | 0      | 0.17  | 0.56  |
| DBDPE           | 0      | 15.98 | 53.27 | 0      | 15.98 | 53.27 |
| Dec-602         | 0      | 0.004 | 0.01  | 0      | 0.004 | 0.01  |
| Dec-604         | 0      | 0.02  | 0.08  | 0      | 0.02  | 0.08  |
| <i>syn</i> -DP  | 0      | 0.01  | 0.02  | 0      | 0.01  | 0.02  |
| <i>anti</i> -DP | 0      | 0.003 | 0.01  | 0      | 0.003 | 0.01  |

Table S5 Air concentrations, LODs, and LOQs of the polybrominated diphenyl ethers (PBDEs) in active air samples from Saturna Island, BC and Tadoussac, QC, in pg/m<sup>3</sup>.

| Start Date                | PBDE congener concentration (pg/m <sup>3</sup> ) |      |      |      |      |      |      |      |      |      |      |      |      |      |
|---------------------------|--------------------------------------------------|------|------|------|------|------|------|------|------|------|------|------|------|------|
|                           | 17                                               | 28   | 49   | 66   | 71   | 85   | 99   | 100  | 138  | 153  | 154  | 183  | 190  | 209  |
| <b>Saturna Island, BC</b> |                                                  |      |      |      |      |      |      |      |      |      |      |      |      |      |
| 2019-12-18                | <LOD                                             | <LOD | <LOD | <LOD | <LOD | <LOD | <LOD | <LOD | <LOD | <LOD | <LOD | <LOD | <LOD | <LOD |
| 2020-01-17                | <LOD                                             | <LOD | <LOD | <LOD | <LOD | <LOD | <LOD | <LOD | <LOD | <LOD | <LOD | <LOD | <LOD | <LOD |
| 2020-02-14                | <LOD                                             | <LOD | <LOD | <LOD | <LOD | <LOD | <LOD | <LOD | <LOD | <LOD | <LOD | <LOD | <LOD | <LOD |
| 2020-03-15                | <LOD                                             | <LOD | <LOD | <LOD | <LOD | <LOD | <LOD | <LOD | <LOD | <LOD | <LOD | <LOD | <LOD | <LOD |
| 2020-05-11                | <LOD                                             | 0.05 | <LOD | <LOD | <LOD | <LOD | 0.18 | <LOD |
| 2020-06-11                | <LOD                                             | 0.10 | <LOD | <LOD | <LOD | <LOD | 0.51 | <LOD |
| 2020-07-08                | <LOD                                             | <LOD | <LOD | <LOD | <LOD | <LOD | 0.50 | <LOD |
| 2020-08-06                | <LOD                                             | <LOD | <LOD | <LOD | <LOD | <LOD | 0.58 | <LOD |
| 2020-09-05                | <LOD                                             | <LOD | <LOD | <LOD | <LOD | <LOD | <LOD | <LOD | <LOD | <LOD | <LOD | <LOD | <LOD | <LOD |
| 2020-10-03                | <LOD                                             | <LOD | <LOD | <LOD | <LOD | <LOD | 0.19 | <LOD |
| 2020-11-01                | <LOD                                             | <LOD | <LOD | <LOD | <LOD | <LOD | <LOD | <LOD | <LOD | <LOD | <LOD | <LOD | <LOD | <LOD |
| LOD                       | 0.01                                             | 0.01 | 0.05 | 0.11 | 0.57 | 0.12 | 0.12 | 0.04 | 0.34 | 0.17 | 0.04 | 0.07 | 0.09 | 1.26 |
| LOQ                       | 0.02                                             | 0.02 | 0.17 | 0.36 | 1.89 | 0.42 | 0.42 | 0.13 | 1.13 | 0.57 | 0.14 | 0.22 | 0.31 | 4.21 |
| <b>Tadoussac, QC</b>      |                                                  |      |      |      |      |      |      |      |      |      |      |      |      |      |
| 2020-12-18                | <LOD                                             | <LOD | <LOD | <LOD | <LOD | <LOD | <LOD | <LOD | <LOD | <LOD | <LOD | <LOD | <LOD | <LOD |
| 2021-01-16                | <LOD                                             | <LOD | <LOD | <LOD | <LOD | <LOD | 0.25 | <LOD |
| 2021-02-14                | <LOD                                             | <LOD | <LOD | <LOD | <LOD | <LOD | 0.28 | <LOD |
| 2021-03-13                | <LOD                                             | <LOD | <LOD | <LOD | <LOD | <LOD | <LOD | <LOD | <LOD | <LOD | <LOD | <LOD | <LOD | <LOD |
| 2021-04-14                | <LOD                                             | <LOD | <LOD | <LOD | <LOD | <LOD | <LOD | <LOD | <LOD | <LOD | <LOD | <LOD | <LOD | <LOD |
| 2021-05-15                | <LOD                                             | <LOD | <LOD | <LOD | <LOD | <LOD | <LOD | <LOD | <LOD | <LOD | <LOD | <LOD | <LOD | <LOD |
| 2021-06-13                | <LOD                                             | <LOD | <LOD | <LOD | <LOD | <LOD | <LOD | <LOD | <LOD | <LOD | <LOD | <LOD | <LOD | <LOD |
| 2021-07-12                | <LOD                                             | <LOD | <LOD | <LOD | <LOD | <LOD | 0.28 | <LOD |
| 2021-08-10                | 0.05                                             | <LOD |
| 2021-09-08                | 0.03                                             | <LOD | <LOD | <LOD | <LOD | <LOD | 0.22 | <LOD |
| 2021-10-07                | <LOD                                             | <LOD | <LOD | <LOD | <LOD | <LOD | 0.25 | <LOD |
| 2021-11-05                | <LOD                                             | <LOD | <LOD | <LOD | <LOD | <LOD | 0.40 | <LOD |
| LOD                       | 0.02                                             | 0.06 | 0.02 | 0.12 | 0.02 | 0.52 | 0.18 | 0.04 | 0.14 | 0.09 | 0.03 | 0.06 | 0.19 | 0.33 |
| LOQ                       | 0.06                                             | 0.21 | 0.07 | 0.41 | 0.07 | 1.74 | 0.60 | 0.14 | 0.46 | 0.30 | 0.10 | 0.19 | 0.63 | 1.10 |

Table S6 Air concentrations, LODs, and LOQs of the other brominated/halogenated flame retardants in active air samples from Saturna Island, BC and Tadoussac, QC, in pg/m<sup>3</sup>.

| Start Date                | Concentration (pg/m <sup>3</sup> ) |      |      |      |      |      |      |       |       |        |        |         |         |        |         |
|---------------------------|------------------------------------|------|------|------|------|------|------|-------|-------|--------|--------|---------|---------|--------|---------|
|                           | ATE                                | BATE | PBBz | PBT  | PBEb | DBTE | HBBz | EHTBB | BTBPE | BEHTBP | DBDPE  | Dec-602 | Dec-604 | syn-DP | anti-DP |
| <b>Saturna Island, BC</b> |                                    |      |      |      |      |      |      |       |       |        |        |         |         |        |         |
| 2019-12-18                | <LOD                               | <LOD | <LOD | <LOD | <LOD | 0.19 | <LOD | <LOD  | <LOD  | <LOD   | <LOD   | <LOD    | <LOD    | <LOD   | <LOD    |
| 2020-01-17                | <LOD                               | <LOD | <LOD | <LOD | <LOD | 0.35 | <LOD | <LOD  | <LOD  | <LOD   | <LOD   | <LOD    | <LOD    | <LOD   | <LOD    |
| 2020-02-14                | <LOD                               | <LOD | <LOD | <LOD | <LOD | 0.45 | <LOD | <LOD  | <LOD  | <LOD   | <LOD   | <LOD    | <LOD    | <LOD   | <LOD    |
| 2020-03-15                | <LOD                               | <LOD | <LOD | <LOD | <LOD | <LOD | <LOD | <LOD  | <LOD  | <LOD   | <LOD   | <LOD    | <LOD    | <LOD   | <LOD    |
| 2020-05-11                | <LOD                               | <LOD | <LOD | <LOD | <LOD | 1.32 | <LOD | <LOD  | <LOD  | <LOD   | <LOD   | <LOD    | <LOD    | <LOD   | <LOD    |
| 2020-06-11                | <LOD                               | <LOD | <LOD | <LOD | <LOD | 1.29 | <LOD | <LOD  | <LOD  | <LOD   | <LOD   | <LOD    | <LOD    | <LOD   | <LOD    |
| 2020-07-08                | <LOD                               | <LOD | <LOD | <LOD | <LOD | 1.49 | <LOD | <LOD  | <LOD  | <LOD   | <LOD   | <LOD    | <LOD    | <LOD   | <LOD    |
| 2020-08-06                | <LOD                               | <LOD | <LOD | <LOD | <LOD | 0.26 | <LOD | <LOD  | <LOD  | 0.66   | <LOD   | <LOD    | <LOD    | <LOD   | <LOD    |
| 2020-09-05                | <LOD                               | <LOD | <LOD | <LOD | <LOD | 0.81 | <LOD | <LOD  | <LOD  | <LOD   | <LOD   | <LOD    | <LOD    | <LOD   | <LOD    |
| 2020-10-03                | <LOD                               | <LOD | <LOD | 0.06 | <LOD | 0.24 | <LOD | <LOD  | <LOD  | <LOD   | <LOD   | <LOD    | <LOD    | <LOD   | <LOD    |
| 2020-11-01                | <LOD                               | <LOD | <LOD | <LOD | <LOD | 0.15 | <LOD | <LOD  | <LOD  | <LOD   | <LOD   | <LOD    | <LOD    | <LOD   | <LOD    |
| LOD                       | 0.21                               | 0.07 | 0.05 | 0.04 | 0.58 | 0.05 | 0.50 | 0.09  | 0.17  | 0.27   | 33.61  | 0.002   | 0.04    | 0.01   | 0.004   |
| LOQ                       | 0.70                               | 0.22 | 0.17 | 0.14 | 1.94 | 0.18 | 1.65 | 0.30  | 0.58  | 0.89   | 112.04 | 0.01    | 0.13    | 0.02   | 0.01    |
| <b>Tadoussac, QC</b>      |                                    |      |      |      |      |      |      |       |       |        |        |         |         |        |         |
| 2020-12-18                | <LOD                               | <LOD | <LOD | <LOD | <LOD | <LOD | <LOD | <LOD  | <LOD  | <LOD   | <LOD   | <LOD    | <LOD    | <LOD   | <LOD    |
| 2021-01-16                | <LOD                               | <LOD | <LOD | <LOD | <LOD | <LOD | <LOD | <LOD  | <LOD  | <LOD   | <LOD   | <LOD    | <LOD    | <LOD   | <LOD    |
| 2021-02-14                | <LOD                               | <LOD | <LOD | <LOD | <LOD | <LOD | <LOD | <LOD  | <LOD  | <LOD   | <LOD   | <LOD    | <LOD    | <LOD   | <LOD    |
| 2021-03-13                | <LOD                               | <LOD | <LOD | <LOD | <LOD | <LOD | <LOD | <LOD  | <LOD  | <LOD   | <LOD   | <LOD    | <LOD    | <LOD   | <LOD    |
| 2021-04-14                | <LOD                               | <LOD | <LOD | <LOD | <LOD | <LOD | <LOD | <LOD  | <LOD  | <LOD   | <LOD   | <LOD    | <LOD    | <LOD   | <LOD    |
| 2021-05-15                | <LOD                               | <LOD | <LOD | <LOD | <LOD | <LOD | <LOD | <LOD  | <LOD  | <LOD   | <LOD   | <LOD    | <LOD    | <LOD   | <LOD    |
| 2021-06-13                | 0.46                               | <LOD  | <LOD  | <LOD   | <LOD   | <LOD    | <LOD    | <LOD   | <LOD    |
| 2021-07-12                | <LOD                               | <LOD | <LOD | <LOD | <LOD | <LOD | <LOD | <LOD  | <LOD  | <LOD   | <LOD   | <LOD    | <LOD    | <LOD   | <LOD    |
| 2021-08-10                | <LOD                               | <LOD | <LOD | <LOD | <LOD | <LOD | <LOD | <LOD  | <LOD  | <LOD   | <LOD   | <LOD    | <LOD    | <LOD   | <LOD    |
| 2021-09-08                | <LOD                               | <LOD | <LOD | <LOD | <LOD | <LOD | <LOD | <LOD  | <LOD  | <LOD   | <LOD   | <LOD    | <LOD    | <LOD   | <LOD    |
| 2021-10-07                | <LOD                               | <LOD | <LOD | <LOD | <LOD | <LOD | <LOD | <LOD  | <LOD  | <LOD   | <LOD   | <LOD    | <LOD    | <LOD   | <LOD    |
| 2021-11-05                | <LOD                               | <LOD | <LOD | <LOD | <LOD | <LOD | <LOD | <LOD  | <LOD  | <LOD   | <LOD   | <LOD    | <LOD    | <LOD   | <LOD    |
| LOD                       | 0.20                               | 0.07 | 0.05 | 0.04 | 0.58 | 0.05 | 0.50 | 0.09  | 0.17  | 0.27   | 33.61  | 0.002   | 0.04    | 0.01   | 0.004   |
| LOQ                       | 0.65                               | 0.22 | 0.17 | 0.14 | 1.94 | 0.18 | 1.65 | 0.30  | 0.58  | 0.89   | 112.04 | 0.01    | 0.13    | 0.02   | 0.01    |

Table S7 Concentrations, LODs, and LOQs of the polybrominated diphenyl ethers (PBDEs) in precipitation samples from Saturna Island, BC and Tadoussac, QC, in pg/L.

| Start Date                | PBDE congener concentration (pg/L) |      |      |      |      |      |      |      |      |      |      |      |       |       |
|---------------------------|------------------------------------|------|------|------|------|------|------|------|------|------|------|------|-------|-------|
|                           | 17                                 | 28   | 49   | 66   | 71   | 85   | 99   | 100  | 138  | 153  | 154  | 183  | 190   | 209   |
| <b>Saturna Island, BC</b> |                                    |      |      |      |      |      |      |      |      |      |      |      |       |       |
| 2019-12-18                | <LOD                               | <LOD | <LOD | <LOD | <LOD | <LOD | <LOD | <LOD | <LOD | <LOD | <LOD | <LOD | <LOD  | <LOD  |
| 2020-01-17                | <LOD                               | <LOD | <LOD | <LOD | <LOD | <LOD | <LOD | 8    | <LOD | <LOD | <LOD | <LOD | <LOD  | <LOD  |
| 2020-02-14                | <LOD                               | <LOD | <LOD | <LOD | <LOD | <LOD | <LOD | <LOD | <LOD | <LOD | <LOD | <LOD | <LOD  | <LOD  |
| 2020-03-15                | <LOD                               | <LOD | <LOD | <LOD | <LOD | <LOD | <LOD | <LOD | <LOD | <LOD | <LOD | <LOD | <LOD  | <LOD  |
| 2020-04-15                | <LOD                               | <LOD | <LOD | <LOD | <LOD | <LOD | <LOD | <LOD | <LOD | <LOD | <LOD | <LOD | <LOD  | <LOD  |
| 2020-05-11                | <LOD                               | <LOD | <LOD | <LOD | <LOD | <LOD | <LOD | <LOD | <LOD | <LOD | <LOD | <LOD | <LOD  | <LOD  |
| 2020-06-11                | <LOD                               | <LOD | <LOD | <LOD | <LOD | <LOD | <LOD | <LOD | <LOD | <LOD | <LOD | <LOD | <LOD  | <LOD  |
| 2020-07-08                | <LOD                               | <LOD | <LOD | <LOD | <LOD | <LOD | <LOD | <LOD | <LOD | <LOD | <LOD | <LOD | <LOD  | <LOD  |
| 2020-08-06                | <LOD                               | <LOD | <LOD | <LOD | <LOD | <LOD | <LOD | <LOD | <LOD | <LOD | <LOD | <LOD | <LOD  | <LOD  |
| 2020-09-05                | <LOD                               | <LOD | <LOD | <LOD | <LOD | <LOD | <LOD | <LOD | <LOD | <LOD | <LOD | <LOD | <LOD  | <LOD  |
| 2020-10-03                | <LOD                               | <LOD | <LOD | <LOD | <LOD | <LOD | 73   | <LOD | <LOD | <LOD | <LOD | <LOD | <LOD  | 263   |
| 2020-11-01                | <LOD                               | <LOD | <LOD | <LOD | <LOD | <LOD | 69   | <LOD | <LOD | 25   | <LOD | <LOD | <LOD  | <LOD  |
| LOD                       | 0.7                                | 0.7  | 4.6  | 5.2  | 5.1  | 11.7 | 10.0 | 1.9  | 13.1 | 9.4  | 5.7  | 10.7 | 22.6  | 47.0  |
| LOQ                       | 2.5                                | 2.3  | 15.2 | 17.2 | 17.1 | 39.1 | 33.3 | 6.5  | 43.6 | 31.3 | 19.2 | 35.6 | 75.3  | 156.6 |
| <b>Tadoussac, QC</b>      |                                    |      |      |      |      |      |      |      |      |      |      |      |       |       |
| 2020-12-18                | <LOD                               | <LOD | <LOD | <LOD | <LOD | <LOD | 58   | <LOD | <LOD | <LOD | 8    | <LOD | 76    | 685   |
| 2021-01-16                | <LOD                               | <LOD | <LOD | <LOD | <LOD | <LOD | 57   | <LOD | <LOD | <LOD | <LOD | <LOD | <LOD  | 219   |
| 2021-02-14                | <LOD                               | <LOD | <LOD | <LOD | <LOD | <LOD | 35   | <LOD | <LOD | <LOD | <LOD | <LOD | <LOD  | 63    |
| 2021-03-13                | <LOD                               | <LOD | <LOD | <LOD | <LOD | <LOD | <LOD | <LOD | <LOD | <LOD | <LOD | <LOD | 77    | 655   |
| 2021-04-14                | <LOD                               | <LOD | <LOD | <LOD | <LOD | <LOD | 91   | <LOD | <LOD | <LOD | <LOD | <LOD | <LOD  | 330   |
| 2021-05-15                | <LOD                               | <LOD | <LOD | <LOD | <LOD | <LOD | 118  | <LOD | <LOD | <LOD | <LOD | <LOD | <LOD  | 403   |
| 2021-06-13                | <LOD                               | <LOD | <LOD | <LOD | <LOD | <LOD | <LOD | <LOD | <LOD | <LOD | <LOD | <LOD | <LOD  | 92    |
| 2021-07-12                | <LOD                               | <LOD | <LOD | <LOD | <LOD | <LOD | <LOD | <LOD | <LOD | <LOD | <LOD | <LOD | <LOD  | 131   |
| 2021-08-10                | <LOD                               | <LOD | <LOD | <LOD | <LOD | <LOD | <LOD | <LOD | <LOD | <LOD | <LOD | <LOD | <LOD  | 108   |
| 2021-09-08                | <LOD                               | <LOD | <LOD | <LOD | <LOD | <LOD | <LOD | <LOD | <LOD | <LOD | <LOD | <LOD | <LOD  | 138   |
| 2021-10-07                | <LOD                               | <LOD | <LOD | <LOD | <LOD | <LOD | <LOD | <LOD | <LOD | <LOD | <LOD | <LOD | <LOD  | 117   |
| LOD                       | 2.2                                | 4.5  | 4.3  | 7.5  | 4.5  | 8.2  | 24.2 | 7.6  | 17.6 | 17.0 | 3.9  | 5.0  | 42.0  | 17.0  |
| LOQ                       | 7.3                                | 14.9 | 14.9 | 25.0 | 15.1 | 27.2 | 80.6 | 25.3 | 58.6 | 56.6 | 13.1 | 16.6 | 140.1 | 56.7  |

Table S8 Concentrations, LODs, and LOQs of the other brominated/halogenated flame retardants in precipitation samples from Saturna Island, BC and Tadoussac, QC, in pg/L.

| Start Date                | Concentration (pg/L) |      |      |      |      |      |       |       |       |        |       |         |         |        |         |
|---------------------------|----------------------|------|------|------|------|------|-------|-------|-------|--------|-------|---------|---------|--------|---------|
|                           | ATE                  | BATE | PBBz | PBT  | PBEb | DBTE | HBBz  | EHTBB | BTBPE | BEHTBP | DBDPE | Dec-602 | Dec-604 | syn-DP | anti-DP |
| <b>Saturna Island, BC</b> |                      |      |      |      |      |      |       |       |       |        |       |         |         |        |         |
| 2019-12-18                | <LOD                 | <LOD | <LOD | <LOD | <LOD | <LOD | <LOD  | <LOD  | <LOD  | <LOD   | <LOD  | <LOD    | <LOD    | 306    | <LOD    |
| 2020-01-17                | <LOD                 | <LOD | <LOD | <LOD | <LOD | <LOD | <LOD  | <LOD  | <LOD  | <LOD   | <LOD  | <LOD    | <LOD    | 86     | <LOD    |
| 2020-02-14                | <LOD                 | <LOD | <LOD | <LOD | <LOD | <LOD | <LOD  | <LOD  | <LOD  | <LOD   | <LOD  | <LOD    | <LOD    | 21     | <LOD    |
| 2020-03-15                | <LOD                 | <LOD | <LOD | <LOD | <LOD | <LOD | <LOD  | <LOD  | <LOD  | <LOD   | <LOD  | <LOD    | <LOD    | 66     | <LOD    |
| 2020-04-15                | <LOD                 | <LOD | <LOD | <LOD | <LOD | <LOD | <LOD  | <LOD  | <LOD  | <LOD   | <LOD  | <LOD    | <LOD    | 30     | <LOD    |
| 2020-05-11                | <LOD                 | <LOD | <LOD | <LOD | <LOD | <LOD | <LOD  | <LOD  | <LOD  | <LOD   | <LOD  | <LOD    | <LOD    | 47     | <LOD    |
| 2020-06-11                | <LOD                 | <LOD | <LOD | <LOD | <LOD | <LOD | <LOD  | <LOD  | <LOD  | <LOD   | <LOD  | <LOD    | <LOD    | 39     | <LOD    |
| 2020-07-08                | <LOD                 | <LOD | <LOD | <LOD | <LOD | <LOD | <LOD  | <LOD  | <LOD  | <LOD   | <LOD  | <LOD    | <LOD    | 98     | <LOD    |
| 2020-08-06                | <LOD                 | <LOD | <LOD | <LOD | <LOD | <LOD | <LOD  | <LOD  | <LOD  | <LOD   | <LOD  | <LOD    | <LOD    | <LOD   | <LOD    |
| 2020-09-05                | <LOD                 | <LOD | <LOD | <LOD | <LOD | <LOD | <LOD  | <LOD  | <LOD  | <LOD   | <LOD  | <LOD    | <LOD    | 59     | <LOD    |
| 2020-10-03                | <LOD                 | <LOD | <LOD | <LOD | <LOD | <LOD | <LOD  | <LOD  | <LOD  | <LOD   | <LOD  | <LOD    | <LOD    | 38     | <LOD    |
| 2020-11-01                | <LOD                 | <LOD | <LOD | <LOD | <LOD | <LOD | <LOD  | <LOD  | <LOD  | <LOD   | <LOD  | <LOD    | <LOD    | 37     | <LOD    |
| LOD                       | 12.0                 | 5.9  | 4.6  | 3.2  | 8.0  | 2.3  | 69.3  | 12.9  | 10.0  | 40.4   | 3683  | 0.6     | 4.5     | 1.4    | 0.9     |
| LOQ                       | 40.0                 | 19.8 | 15.5 | 10.8 | 26.6 | 7.8  | 231.0 | 43.1  | 33.5  | 134.7  | 12275 | 2.0     | 15.1    | 4.7    | 3.0     |
| <b>Tadoussac, QC</b>      |                      |      |      |      |      |      |       |       |       |        |       |         |         |        |         |
| 2020-12-18                | <LOD                 | <LOD | <LOD | <LOD | <LOD | <LOD | <LOD  | <LOD  | <LOD  | <LOD   | <LOD  | <LOD    | <LOD    | 625    | <LOD    |
| 2021-01-16                | <LOD                 | <LOD | <LOD | <LOD | <LOD | <LOD | <LOD  | <LOD  | <LOD  | <LOD   | <LOD  | <LOD    | <LOD    | 134    | <LOD    |
| 2021-02-14                | <LOD                 | <LOD | <LOD | <LOD | <LOD | <LOD | <LOD  | <LOD  | <LOD  | <LOD   | <LOD  | <LOD    | <LOD    | 74     | <LOD    |
| 2021-03-13                | <LOD                 | <LOD | <LOD | <LOD | <LOD | <LOD | <LOD  | <LOD  | <LOD  | <LOD   | <LOD  | <LOD    | <LOD    | 211    | <LOD    |
| 2021-04-14                | <LOD                 | <LOD | <LOD | <LOD | <LOD | <LOD | <LOD  | <LOD  | <LOD  | <LOD   | <LOD  | <LOD    | <LOD    | 153    | <LOD    |
| 2021-05-15                | <LOD                 | <LOD | <LOD | <LOD | <LOD | <LOD | <LOD  | <LOD  | <LOD  | <LOD   | <LOD  | <LOD    | <LOD    | 86     | <LOD    |
| 2021-06-13                | <LOD                 | <LOD | <LOD | <LOD | <LOD | <LOD | <LOD  | <LOD  | <LOD  | <LOD   | <LOD  | <LOD    | <LOD    | 81     | <LOD    |
| 2021-07-12                | <LOD                 | <LOD | <LOD | <LOD | <LOD | <LOD | <LOD  | <LOD  | <LOD  | <LOD   | <LOD  | <LOD    | <LOD    | 233    | <LOD    |
| 2021-08-10                | <LOD                 | <LOD | <LOD | <LOD | <LOD | <LOD | <LOD  | <LOD  | <LOD  | <LOD   | <LOD  | <LOD    | <LOD    | 35     | <LOD    |
| 2021-09-08                | <LOD                 | <LOD | <LOD | <LOD | <LOD | <LOD | <LOD  | <LOD  | <LOD  | <LOD   | <LOD  | <LOD    | <LOD    | 42     | <LOD    |
| 2021-10-07                | <LOD                 | <LOD | <LOD | <LOD | <LOD | <LOD | <LOD  | <LOD  | <LOD  | <LOD   | <LOD  | <LOD    | <LOD    | 62     | <LOD    |
| LOD                       | 14.3                 | 4.1  | 3.2  | 2.3  | 5.6  | 1.6  | 48.3  | 9.0   | 7.0   | 28.2   | 2565  | 0.4     | 3.2     | 0.7    | 0.6     |
| LOQ                       | 47.7                 | 13.8 | 10.8 | 7.5  | 18.6 | 5.5  | 160.9 | 30.0  | 23.3  | 93.8   | 8550  | 1.4     | 10.5    | 2.3    | 2.1     |

## Text S2 Details on passive water sampling

At several sites passive water samplers (PWSs) were deployed at different depths, indicated as \_Top, \_Mid, and \_Bot in Table S9. Duplicate measurements are labelled as \_1, \_2, etc. Before deployment, LDPE sheets were infused with a selected group of polycyclic aromatic hydrocarbons (d<sub>10</sub>-acenaphthene, d<sub>10</sub>-phenanthrene, d<sub>10</sub>-pyrene, d<sub>12</sub>-chrysene, d<sub>12</sub>-indo[a,2,3-c,d] pyrene) and polychlorinated biphenyls (PCB-4, 9, 29, 62, 104, 127, 155, 184, and 204) as performance reference compounds (PRCs) to determine the sampling rates of the target analytes at each PWS site. The sheets were soaked in 1 L jars containing 800 mL of 4:1 methanol:water and the PRC solution in acetone, which were then equilibrated using a roller for five days at ambient temperature. The LDPE sheets were wiped with pre-extracted Kimwipes (dichloromethane (DCM) and acetone) to remove any residual water and methanol. Afterwards, the sheets were stored in an amber glass vial in a freezer until deployment.

Table S9 Deployment locations, dates, and lengths of the passive water samples, and the measured water concentrations in pg/L of TBECH and BDE-47 in BC and QC.

| Site name               | Latitude  | Longitude   | Deployment date | Retrieval date | Deployment length (d) | α-TBECH | β-TBECH | BDE-47 |
|-------------------------|-----------|-------------|-----------------|----------------|-----------------------|---------|---------|--------|
| <b>Quebec</b>           |           |             |                 |                |                       |         |         |        |
| W1                      | 45.534828 | -73.527722  | 2021-07-28      | 2021-08-24     | 27                    | <LOD    | <LOD    | 0.93   |
| W2                      | 45.565794 | -73.509158  | 2021-07-28      | 2021-08-24     | 27                    | <LOD    | <LOD    | 0.35   |
| W3                      | 45.734786 | -73.417161  | 2021-07-28      | 2021-08-24     | 27                    | <LOD    | <LOD    | 0.87   |
| W4                      | 45.790644 | -73.344667  | 2021-07-28      | 2021-08-24     | 27                    | <LOD    | <LOD    | 0.78   |
| W5                      | 46.041253 | -73.164931  | 2021-07-28      | 2021-08-25     | 28                    | <LOD    | <LOD    | 6.03   |
| W6                      | 46.243575 | -72.745303  | 2021-07-29      | 2021-08-25     | 27                    | <LOD    | <LOD    | 2.04   |
| W7                      | 46.3789   | -72.446983  | 2021-07-29      | 2021-08-25     | 27                    | <LOD    | <LOD    | 1.63   |
| W8                      | 46.832103 | -71.171719  | 2021-07-30      | 2021-08-27     | 28                    | <LOD    | <LOD    | 3.61   |
| W9                      | 46.844189 | -71.171194  | 2021-07-30      | 2021-08-27     | 28                    | <LOD    | <LOD    | 3.19   |
| W10_1                   | 48.507811 | -68.517803  | 2021-04-29      | 2021-05-31     | 32                    | <LOD    | <LOD    | 1.37   |
| W10_2                   | 48.507811 | -68.517803  | 2021-04-29      | 2021-06-25     | 57                    | <LOD    | <LOD    | 1.53   |
| W10_3                   | 48.507811 | -68.517803  | 2021-04-29      | 2021-07-08     | 70                    | <LOD    | <LOD    | 0.81   |
| <b>British Columbia</b> |           |             |                 |                |                       |         |         |        |
| V1_Top                  | 49.29159  | -122.88631  | 2021-06-21      | 2021-07-26     | 35                    | 0.38    | 0.17    | 1.33   |
| V1_Mid                  | 49.29159  | -122.88631  | 2021-06-21      | 2021-07-26     | 35                    | 0.66    | 0.41    | 2.08   |
| V1_Bot                  | 49.29159  | -122.88631  | 2021-06-21      | 2021-07-26     | 35                    | 0.27    | 0.22    | 1.28   |
| V2_1_Top                | 49.32041  | -122.91019  | 2021-07-20      | 2021-08-09     | 20                    | 0.08    | <LOD    | 0.50   |
| V2_1_Bot                | 49.32041  | -122.91019  | 2021-07-20      | 2021-08-09     | 20                    | <LOD    | <LOD    | 0.90   |
| V2_2_Top                | 49.32041  | -122.91019  | 2021-06-29      | 2021-07-20     | 21                    | <LOD    | <LOD    | 1.11   |
| V2_2_Bot                | 49.32041  | -122.91019  | 2021-06-29      | 2021-07-26     | 27                    | 0.07    | <LOD    | 1.08   |
| V3_1                    | 49.33998  | -123.2335   | 2021-05-14      | 2021-06-03     | 20                    | <LOD    | <LOD    | 2.07   |
| V3_2                    | 49.33998  | -123.2335   | 2021-05-14      | 2021-06-03     | 20                    | <LOD    | <LOD    | 2.71   |
| V3_3                    | 49.33998  | -123.2335   | 2021-05-14      | 2021-06-03     | 20                    | <LOD    | <LOD    | 2.19   |
| V4_1_Top                | 49.180346 | -123.184825 | 2021-07-09      | 2021-07-30     | 21                    | <LOD    | <LOD    | 1.05   |
| V4_1_Mid                | 49.180346 | -123.184825 | 2021-07-09      | 2021-07-30     | 21                    | 0.08    | <LOD    | 1.46   |
| V4_1_Bot                | 49.180346 | -123.184825 | 2021-07-09      | 2021-07-30     | 21                    | 0.12    | <LOD    | 0.95   |
| V4_2_Top                | 49.180346 | -123.184825 | 2021-07-30      | 2021-08-20     | 21                    | 0.19    | <LOD    | 1.36   |
| V4_2_Mid                | 49.180346 | -123.184825 | 2021-07-30      | 2021-08-20     | 21                    | 0.36    | 0.3     | 1.49   |
| V4_2_Bot                | 49.180346 | -123.184825 | 2021-07-30      | 2021-08-20     | 21                    | 0.21    | 0.09    | 1.49   |
| V5_1_Top                | 49.08074  | -123.130229 | 2021-06-24      | 2021-07-15     | 21                    | <LOD    | <LOD    | 0.54   |
| V5_1_Mid                | 49.08074  | -123.130229 | 2021-06-24      | 2021-07-15     | 21                    | <LOD    | <LOD    | 0.74   |
| V5_1_Bot                | 49.08074  | -123.130229 | 2021-06-24      | 2021-07-15     | 21                    | <LOD    | <LOD    | 0.58   |
| V5_2_Top                | 49.08074  | -123.130229 | 2021-06-03      | 2021-06-24     | 21                    | 0.12    | <LOD    | 0.59   |



|          |            |              |            |            |    |      |      |      |
|----------|------------|--------------|------------|------------|----|------|------|------|
| V5_2_Mid | 49.08074   | -123.130229  | 2021-06-03 | 2021-06-24 | 21 | <LOD | <LOD | 0.60 |
| V5_2_Bot | 49.08074   | -123.130229  | 2021-06-03 | 2021-06-24 | 21 | <LOD | <LOD | 0.45 |
| V6_Top   | 48.4381769 | -123.381617  | 2021-08-10 | 2021-09-01 | 22 | 0.18 | 0.17 | 3.70 |
| V6_Mid   | 48.4381769 | -123.381617  | 2021-08-10 | 2021-09-01 | 22 | 0.19 | 0.11 | 2.13 |
| V6_Bot   | 48.4381769 | -123.381617  | 2021-08-10 | 2021-09-01 | 22 | 0.57 | 0.35 | 2.15 |
| V7_Top   | 48.4274641 | -123.3714434 | 2021-08-10 | 2021-09-01 | 22 | 0.36 | 0.3  | 2.05 |
| V7_Bot   | 48.4274641 | -123.3714434 | 2021-08-10 | 2021-09-01 | 22 | 0.44 | 0.33 | 1.46 |
| V8_Top   | 48.4230709 | -123.3712278 | 2021-08-10 | 2021-09-01 | 22 | 0.61 | 0.4  | 2.11 |
| V8_Mid   | 48.4230709 | -123.3712278 | 2021-08-10 | 2021-09-01 | 22 | 0.43 | 0.25 | 1.84 |
| V8_Bot   | 48.4230709 | -123.3712278 | 2021-08-10 | 2021-09-01 | 22 | 0.53 | 0.39 | 1.54 |
| V9_Top   | 48.4235958 | -123.3850258 | 2021-08-10 | 2021-09-01 | 22 | 0.62 | 0.43 | 0.88 |
| V9_Mid   | 48.4235958 | -123.3850258 | 2021-08-10 | 2021-09-01 | 22 | 0.74 | 0.62 | 1.19 |
| V9_Bot   | 48.4235958 | -123.3850258 | 2021-08-10 | 2021-09-01 | 22 | 0.89 | 0.56 | 0.99 |
| V10_Top  | 48.4385813 | -123.4336827 | 2021-08-10 | 2021-09-01 | 22 | 1.35 | 0.96 | 0.47 |
| V10_Mid  | 48.4385813 | -123.4336827 | 2021-08-10 | 2021-09-01 | 22 | 2.22 | 1.42 | 0.42 |
| V10_Bot  | 48.4385813 | -123.4336827 | 2021-08-10 | 2021-09-01 | 22 | 1.67 | 1.07 | 0.37 |

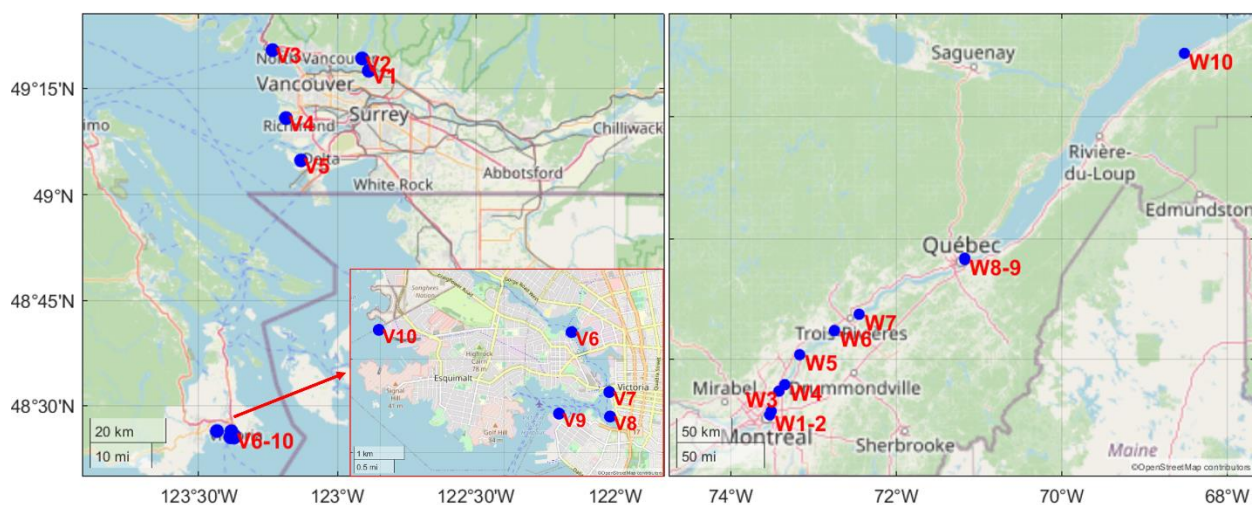

Figure S2 Map of the PWS sites and their site numbers in British Columbia (left) and Quebec (right).

### Text S3 Details on sample extraction methods

Compounds were extracted from the XAD-2 resin (BC and QC PASSs), the PUF/XAD-2/PUF sandwiches (Toronto AASs), and the GFFs (Saturna Island and Tadoussac AASs) by pressurised liquid extraction using an accelerated solvent extractor (ASE 350, Dionex, Sunnyvale, CA). Sample extraction was performed with hexane/acetone (V/V = 1:1) at 75°C and 1500 psi with a heat- and static-time of 6 min using three extraction cycles. The PUF/XAD-2/PUF sandwiches (Saturna Island and Tadoussac AASs) were Soxhlet extracted with 375 mL DCM for 20-22 hours. Compounds were extracted from the filtered precipitation samples using liquid-liquid extraction with 50 mL DCM three times. Compounds from the LDPE sheets were extracted by soaking in hexanes overnight two times.  $^{13}\text{C}$ -labelled surrogates ( $^{13}\text{C}_{12}$ -BDE 28,  $^{13}\text{C}_{12}$ -BDE 47,  $^{13}\text{C}_{12}$ -BDE-99,  $^{13}\text{C}_{12}$ -BDE 139,  $^{13}\text{C}_{12}$ -BDE180,  $^{13}\text{C}_{12}$ -BDE209,  $^{13}\text{C}_6$ -PBBz,  $^{13}\text{C}_6$ -HBBz,  $^{13}\text{C}_{10}$ -Dec-602,  $^{13}\text{C}_6$ -EHTBB,  $^{13}\text{C}_6$ -BTBPE,  $^{13}\text{C}_6$ -BEHTBP,  $^{13}\text{C}_{10}$ -anti-DP, and  $^{13}\text{C}_{14}$ -DBDPE, were spiked into all samples prior to extraction. All extracts were reduced to 1 mL using a rotary evaporator and then passed through anhydrous sodium sulfate (baked at 450 °C overnight) to remove water residue. The extracts were

concentrated with high purity nitrogen and solvent-exchanged into iso-octane. The final volume of the extracts was ca. 0.5 mL. Injection standards ( $^{13}\text{C}_{12}$ -PCB-105,  $^{13}\text{C}_{12}$ -PCB-180, BDE-205, and  $^{13}\text{C}_{10}$ -Mirex) were added prior to instrumental analysis.

#### Text S4 Details on instrumental analysis and QA/QC procedures

Instrumental analysis for the quantification of these compounds in environmental samples was conducted by high-resolution gas chromatography (GC) coupled to TSQ8000 Evo triple quadrupole MS/MS equipped with a TriPlus RSH auto sampler, operated in EI mode. A volume of 2.0  $\mu\text{L}$  was injected in pulsed splitless mode using a TriPlus RSH autosampler (80  $^{\circ}\text{C}$  for 0.05 min, followed by temperature ramp up to 280  $^{\circ}\text{C}$  at 14.5  $^{\circ}\text{C}/\text{s}$ ). Chromatographic separation was accomplished using an RTX-5 column (Restek: 15 m, 0.25mm I.D., 0.1  $\mu\text{m}$  film thickness) and helium as a carrier gas (flow rate: 1.2 mL/min). The ion source and interface temperature were set to 280  $^{\circ}\text{C}$  and 290  $^{\circ}\text{C}$ , respectively. The GC oven temperature program was set to begin at 90 $^{\circ}\text{C}$ , hold for 1 minute, ramp to 250 $^{\circ}\text{C}$  at 18  $^{\circ}\text{C}/\text{min}$ , then further ramp to 280  $^{\circ}\text{C}$  at 10  $^{\circ}\text{C}/\text{min}$  and finally, ramp to 310  $^{\circ}\text{C}$  at 30  $^{\circ}\text{C}/\text{min}$  and hold for 6 minutes. The precursor and product ions, as well as the collision energies (CEs) of the target compounds are tabulated in Table S10.

The air and passive water sample extracts were analyzed for enantiomers of  $\alpha$ -TBECH using an Agilent 5977A mass spectrometer (MS) connected to a 7890B GC, with helium as the carrier gas at 1.2 mL min $^{-1}$ . The GC- MS was operated in selected ion monitoring mode under negative chemical ionization mode. The chemical ionization reagent gas was methane. Enantiomers of  $\alpha$ -TBECH were separated using a BGB-176MS column (10% 2,3-dimethyl-6-tert-butyl-dimethylsilyl- $\beta$ -cyclodextrin in BGB 1, 15 m  $\times$  0.25 mm i.d., 0.18  $\mu\text{m}$  film thickness, BGB Analytik AG, Switzerland) (Wong et al., 2012). The temperature of transfer line, inlet and ion source and quadrupole were at 250 $^{\circ}\text{C}$ , 120 $^{\circ}\text{C}$  and 150 $^{\circ}\text{C}$ , respectively. The GC oven temperature was set at 80  $^{\circ}\text{C}$  for 1 min, then increased at a rate of 5  $^{\circ}\text{C}/\text{min}$  to 135  $^{\circ}\text{C}$  and held for 30 min and finally increased at a rate of 10  $^{\circ}\text{C}/\text{min}$  to 220  $^{\circ}\text{C}$  and held for 10 min. Splitless-mode injections of 2  $\mu\text{L}$  were made using an autosampler/autoinjector system. The monitored ions were 79 and 81 m/z. To determine enantiomer fraction (EFs) for  $\alpha$ -TBECH, the elution order was used and calculated as E1/(E1+E2), since the correspondence between optical signs and chromatographic elution is unknown for the TBECH (Wong et al., 2012).

Prior to use, all glassware was machine-washed (Miele) with detergent, rinsed with DI water, and baked for 24 hours. Laboratory equipment used to handle samples or extracts were cleaned and rinsed with acetone and hexane three times. The average recoveries of the  $^{13}\text{C}$ -labeled HFRs whose native counterparts were detected in the samples in this study ( $^{13}\text{C}_6$ -PBBz,  $^{13}\text{C}_{12}$ -BDE-28,  $^{13}\text{C}_{12}$ -BDE-47,  $^{13}\text{C}_{12}$ -BDE-99,  $^{13}\text{C}_{12}$ -BDE-139,  $^{13}\text{C}_{12}$ -BDE-180, and  $^{13}\text{C}_{12}$ -BDE-209) are summarized in Table S11. Limits of detection (LOD) and quantification (LOQ) of each sampling technique were defined as the concentration at which the signal-to-noise ratio is equal to 3 and 10, respectively, and are tabulated for each target analyte in Table S12.

Blanks were used to quantify any contamination that may have occurred during preparation, transport, and handling of the samples. Procedural blanks (n=23) were clean collecting media that were not exposed to the environment, i.e., did not leave the laboratory. Field blanks are collecting media that underwent the same transport and processing as exposed samplers. PAS field blanks (BC: n=47; QC: n=19) consisted

of XAD-filled mesh cylinders that were briefly exposed to the air during the deployment of a PAS and then stored in a sealed shipping container at the sampling site for the duration of deployment. AAS field blanks (BC: n=6 QC: n=5; ON: n=4) were cartridges and GFFs that were briefly placed in the sampler without operating the pump. PWS field blanks (BC: n=10; QC: n=2) were LDPE sheets that were briefly exposed to the environment before being sealed and stored at the sampling site. Precipitation field blanks (BC: n=2 QC: n=3) were empty precipitation and overflow bottles briefly exposed to the environment before being sealed and stored at the sampling site for the duration of the employment. Blanks went through the entire extraction and quantification procedure with the samples. Levels of the analytes in all field and procedure blanks were consistently below LOD.

Table S10 The mass-to-charge ratios of precursor and product ions and the collision energies (CEs in eV) of the target halogenated flame retardants, internal standards, and injection standards.

| Compound                               | Precursor | Product | CE | Compound                                        | Precursor | Product | CE |
|----------------------------------------|-----------|---------|----|-------------------------------------------------|-----------|---------|----|
|                                        | 329.8     | 140.8   | 40 | <sup>13</sup> C <sub>6</sub> -EHTBB             | 428.9     | 240.9   | 60 |
| ATE                                    | 331.8     | 142.9   | 30 |                                                 | 444.9     | 321.9   | 60 |
|                                        | 264.9     | 105.1   | 10 | <sup>13</sup> C <sub>12</sub> -BDE-99           | 575.6     | 415.7   | 26 |
| α-TBECH                                | 266.9     | 105     | 10 |                                                 | 575.6     | 417.7   | 26 |
|                                        | 264.9     | 105.1   | 10 | EHTBB                                           | 422.8     | 313.8   | 40 |
| β-TBECH                                | 266.9     | 105     | 10 |                                                 | 422.8     | 394.7   | 25 |
|                                        | 329.8     | 140.8   | 40 | BDE-85                                          | 403.8     | 296.8   | 35 |
| BATE                                   | 331.8     | 142.9   | 30 |                                                 | 565.7     | 405.9   | 25 |
|                                        | 471.5     | 311.8   | 50 | BDE-154                                         | 483.7     | 323.8   | 50 |
| PBBz                                   | 473.5     | 313.7   | 50 |                                                 | 643.7     | 483.4   | 25 |
|                                        | 480       | 319.7   | 45 | BDE-153                                         | 483.7     | 323.8   | 50 |
| <sup>13</sup> C <sub>6</sub> -PBBz     | 481.8     | 240.9   | 60 |                                                 | 643.7     | 483.4   | 25 |
|                                        | 245.9     | 139     | 35 | <sup>13</sup> C <sub>12</sub> -BDE-139          | 497.7     | 228     | 60 |
| BDE-17                                 | 405.8     | 246     | 20 |                                                 | 655.7     | 495.7   | 40 |
|                                        | 406.7     | 246.9   | 45 | BDE-138                                         | 483.7     | 323.8   | 50 |
| PBT                                    | 485.7     | 406.8   | 20 |                                                 | 643.7     | 483.4   | 25 |
|                                        | 245.9     | 139     | 35 | Dec-604                                         | 417.8     | 338.8   | 15 |
| BDE-28                                 | 405.8     | 245.9   | 20 |                                                 | 419.8     | 259.9   | 25 |
|                                        | 417.8     | 257.9   | 20 | BDE-183                                         | 561.7     | 454.5   | 50 |
| <sup>13</sup> C <sub>12</sub> -BDE-28  | 419.8     | 260     | 20 |                                                 | 721.7     | 561.7   | 25 |
|                                        | 335.9     | 265.9   | 15 | BTBPE                                           | 356.8     | 251.9   | 25 |
| <sup>13</sup> C <sub>12</sub> -PCB-105 | 337.9     | 267.9   | 15 |                                                 | 358.8     | 251.9   | 30 |
|                                        | 484.7     | 405.7   | 20 | <sup>13</sup> C <sub>6</sub> -BTBPE             | 362.8     | 95.1    | 55 |
| PBEB                                   | 499.7     | 484.7   | 20 |                                                 | 364.8     | 283.9   | 10 |
|                                        | 329.8     | 140.9   | 50 | <sup>13</sup> C <sub>12</sub> -BDE-180          | 573.7     | 413.8   | 45 |
| DPTE                                   | 331.8     | 142.9   | 50 |                                                 | 575.7     | 415.8   | 45 |
|                                        | 397.7     | 316.8   | 25 | BDE-190                                         | 561.7     | 454.5   | 50 |
| <sup>13</sup> C <sub>6</sub> -HBBz     | 477.6     | 397.7   | 30 |                                                 | 721.7     | 561.7   | 25 |
|                                        | 549.7     | 470.7   | 25 | <sup>13</sup> C <sub>6</sub> -BEHTBP            | 128.3     | 62.1    | 15 |
| HBBz                                   | 551.8     | 391.6   | 50 |                                                 | 128.3     | 80.5    | 5  |
|                                        | 325.9     | 217     | 30 | BEHTBP                                          | 462.7     | 378.7   | 40 |
| BDE-71                                 | 485.7     | 325.9   | 20 |                                                 | 464.7     | 380.7   | 40 |
|                                        | 325.9     | 217     | 30 | <i>syn</i> -DP                                  | 273.6     | 238.8   | 25 |
| BDE-49                                 | 485.7     | 325.9   | 20 |                                                 | 271.8     | 236.9   | 25 |
|                                        | 405.7     | 335.9   | 30 | <i>anti</i> -DP                                 | 271.8     | 236.9   | 25 |
| <sup>13</sup> C <sub>12</sub> -PCB-180 | 407.6     | 373     | 15 |                                                 | 273.6     | 238.8   | 25 |
|                                        | 325.9     | 217     | 30 | <sup>13</sup> C <sub>10</sub> - <i>anti</i> -DP | 277       | 242     | 25 |
| BDE-47                                 | 485.7     | 325.9   | 20 |                                                 | 279       | 244     | 25 |
| <sup>13</sup> C <sub>12</sub> -BDE-47  | 337.9     | 148.9   | 55 | BDE-205                                         | 641.7     | 534.5   | 50 |

|                                        |       |       |    |                                        |       |       |    |
|----------------------------------------|-------|-------|----|----------------------------------------|-------|-------|----|
|                                        | 497.7 | 337.9 | 25 |                                        | 801.7 | 641.7 | 25 |
|                                        | 325.9 | 217   | 30 |                                        | 801.7 | 641.7 | 50 |
| BDE-66                                 | 485.7 | 325.9 | 20 | BDE-209                                | 799.7 | 639.8 | 50 |
| <sup>13</sup> C <sub>8</sub> -Mirex    | 275.7 | 240.6 | 30 |                                        | 959.4 | 799.3 | 32 |
|                                        | 403.8 | 296.8 | 35 | <sup>13</sup> C <sub>12</sub> -BDE-209 | 811.8 | 651.4 | 45 |
| BDE-100                                | 565.7 | 405.9 | 25 |                                        | 971.4 | 811.3 | 32 |
|                                        | 271.8 | 236.9 | 20 | DBDPE                                  | 484.7 | 324.7 | 60 |
| Dec-602                                | 273.6 | 238.9 | 20 |                                        | 486.7 | 326.7 | 50 |
| <sup>13</sup> C <sub>10</sub> -Dec-602 | 277   | 242   | 20 | <sup>13</sup> C <sub>14</sub> -DBDPE   | 491.7 | 331.8 | 60 |
|                                        | 403.8 | 296.8 | 35 |                                        | 493.6 | 333.9 | 60 |
| BDE-99                                 | 565.7 | 405.9 | 25 |                                        |       |       |    |

Table S11 Summary of the recoveries of the <sup>13</sup>C-labeled HFRs from the samples of this study.

| Compound                               | Recovery (%) |             |               |            |
|----------------------------------------|--------------|-------------|---------------|------------|
|                                        | PAS          | AAS         | Precipitation | PWS        |
| <sup>13</sup> C <sub>6</sub> -PBBz     | 102.2±20.2   | 84.7±21.9   | 88.0±16.1     | 107.0±9.3  |
| <sup>13</sup> C <sub>12</sub> -BDE-28  | 106.7±22.5   | 89.1±24.5   | 85.7±12.9     | 94.5±6.1   |
| <sup>13</sup> C <sub>12</sub> -BDE-47  | 120.2±11.2   | 107.0±39.6  | 97.1±13.1     | 106.0±6.8  |
| <sup>13</sup> C <sub>12</sub> -BDE-99  | 117.4±15.5   | 98.3±39.4   | 103.0±16.6    | 104.8±8.0  |
| <sup>13</sup> C <sub>12</sub> -BDE-139 | 145.1±32.8   | 156.5±84.3  | 139.5±39.3    | 141.7±38.1 |
| <sup>13</sup> C <sub>12</sub> -BDE-180 | 170.7±46.6   | 182.5±114.0 | 152.8±53.7    | 159.7±26.2 |
| <sup>13</sup> C <sub>12</sub> -BDE-209 | 138.7±45.7   | 114.8±84.5  | 168.3±90.4    | 245.5±91.6 |

Table S12 The average LOD and LOQ of TBECH and BDE-47 from the passive air sampling and passive water sampling network, as well as the precipitation samples and AAS stations. All volumetric air and water concentrations are expressed in pg/m<sup>3</sup> and pg/L, respectively.

|                                          |     | α-TBECH                 | β-TBECH                 | BDE-47 |
|------------------------------------------|-----|-------------------------|-------------------------|--------|
| PAS network                              | LOD | 0.10                    | 0.13                    | 0.59   |
|                                          | LOQ | 0.33                    | 0.43                    | 2.00   |
| PWS network                              | LOD | 0.06                    | 0.05                    | 0.02   |
|                                          | LOQ | 0.20                    | 0.17                    | 0.068  |
| Saturna Island, BC AAS                   | LOD | 7.17 x 10 <sup>-3</sup> | 7.17 x 10 <sup>-3</sup> | 0.07   |
|                                          | LOQ | 0.02                    | 0.02                    | 0.24   |
| Saturna Island, BC precipitation bottles | LOD | 0.2                     | 0.2                     | 0.4    |
|                                          | LOQ | 0.6                     | 0.6                     | 1.3    |
| Tadoussac, QC AAS                        | LOD | 7.17 x 10 <sup>-3</sup> | 7.17 x 10 <sup>-3</sup> | 0.046  |
|                                          | LOQ | 0.02                    | 0.02                    | 0.15   |
| Tadoussac, QC precipitation bottles      | LOD | 2.9                     | 3.9                     | 12.4   |
|                                          | LOQ | 9.8                     | 13.2                    | 41.5   |
| Toronto, ON AAS                          | LOD | 0.01                    | 0.01                    | 0.02   |
|                                          | LOQ | 0.04                    | 0.04                    | 0.05   |

#### Text S5 Details on calculation of air and water concentrations

Volumetric air concentrations were calculated by dividing the amount of a target compound quantified in a PAS (pg) by the product of a sampling rate in m<sup>3</sup>/day and the deployment period in days. The sampling rates of α- and β-TBECH and BDE-47 were 0.41, 0.35, and 0.17 m<sup>3</sup>/day, respectively (Li et al., 2023). Water concentrations of the target analytes were calculated by using the retained fraction (f) of the PRCs in the deployed LDPE sheets. Using a spreadsheet provided by Booij and Smedes (2010) (Excel Solver add-in), a

nonlinear least squares (NLS) estimation was used to determine a site- and compound specific sampling rate ( $R_s$  is in L/d) and a site-specific coefficient (FA) with the following equations:

$$f = \exp[(-R_s t)/(K_{PW} m_p)] \quad (\text{eq1})$$

$$R_s = FA M^{-0.35} \quad (\text{eq2})$$

where  $t$  is the deployment time (days),  $K_{PW}$  is the LDPE PWS-water partition ratio (L/kg),  $m_p$  is the average mass of the LDPE sheets (kg),  $M$  is the molecular weight of the compound (g/mol).  $K_{PW}$  values of the target analytes were estimated with calculated Abraham solute descriptors (Ulrich et al., 2017) using the models detailed in Khawar and Nabi (2021).  $K_{PW}$  values of the PRCs were derived using the solvation models by Smedes et al. (2009). Once the FA values of each site were estimated using the PRC dissipation data,  $R_s$  was adjusted to each analyte using equation 2. The volumetric water concentration ( $C_w$ ) of each analyte was then calculated:

$$C_w = \frac{N}{K_{PW} m_p [1 - \exp(-R_s t / K_{PW} m_p)]} \quad (\text{eq3})$$

where  $N$  is the amount of target analyte accumulated on the LDPE sheets.

#### Text S6 Details on COSMOtherm predictions

Equilibrium partition ratios between octanol and water ( $K_{ow}$ ), octanol and air ( $K_{oa}$ ), and air and water ( $K_{aw}$ ) were estimated with the Conductor like Screening Model for Realistic Solvents (COSMO-RS) software suite. The COSMO-RS is a chemical property prediction tool, which requires both COSMOconf with TURBOMOLE and COSMOtherm from Dassault Systèmes. This approach uses both quantum chemical density functional theory (DFT) and statistical thermodynamics of the molecular interactions to predict various physical-chemical properties of compounds. Using COSMO-RS consists of two parts, with the first part involving the use of COSMOconf with TURBOMOLE to determine different possible conformations of the molecule based on its polar charge density and how these charges interact with a virtual conductor environment using DFT/COSMO calculations. The resulting electron density and geometry of the molecule are used to identify the most energetically optimal state for the compound in the virtual conductor (Klamt et al., 2009). For the second part, COSMOtherm is then used to quantify the interaction energy of the chemical in two different phases by using the polar charge density of the different conformations of the compound. When combined with statistical thermodynamics, the chemical potential of the compound in the different phases, and therefore, the Gibbs free energy of the phase transfer ( $\Delta G^\circ$ ) can be calculated (Klamt et al., 2009), which can be converted into partition ratios using the following equation:

$$\text{Log } K = \text{Log} \left( \exp \left( \frac{-\Delta G^\circ}{RT} \right) \right)$$

The SDF text files of the isomers, generated by OpenBabel v3.11, were entered into COSMOconf v20.0.0 with TURBOMOLE v4.5 to generate COSMO files. All conformers were entered into COSMOtherm v20.0.0 using the TZVPD-FINE parameterization to calculate the  $\Delta G^\circ$  for each isomer at a given temperature, which were then converted into its corresponding log  $K$  values.

Table S13 Comparison of the mean/median and range of the air concentrations of  $\alpha$ - and  $\beta$ -TBECH reported in this study, with those reported in previous studies, categorized by the type of sampling location (outdoor air vs. indoor air and urban vs. remote regions).

| Location                             | n=  | Date               | Sampling technique       | Concentration in $\text{pg m}^{-3}$                      |                        | $\alpha/\beta$ -ratio | ref.                     |
|--------------------------------------|-----|--------------------|--------------------------|----------------------------------------------------------|------------------------|-----------------------|--------------------------|
|                                      |     |                    |                          | average (A) or median (M) (Range)                        |                        |                       |                          |
| <b>Outdoor Air in Source Regions</b> |     |                    |                          |                                                          |                        |                       |                          |
|                                      |     |                    |                          | $\alpha$                                                 | $\beta$                |                       |                          |
| Stockholm, Sweden                    | 24  | Apr 2014–May 2015  | AAS (GFF, 2 PUFs)        | 0.52 (M) (0.13–1.2)                                      | 0.35 (M) (0.11–0.88)   | 1.5                   | (Wong et al., 2018)      |
| Stockholm, Sweden                    | 28  | Apr–Jun 2012       | AAS (GFF, 2 PUFs)        | 0.36 (M) (<0.087–1.4)                                    | 0.20 (M) (<0.079–0.95) | 1.8                   | (Newton et al., 2015)    |
| Birmingham, UK                       | 48  | Jun 2012–Jan 2013  | PAS (PUF, GFF)           | 2.2 (M) (<0.078–28)                                      | 1.7 (M) (<0.063–15)    | 1.3                   | (Drage et al., 2016)     |
| Ziya Town, China                     | 1   | Jun–Aug 2011       | PAS (PUF)                | 9.0                                                      | 30                     | 0.30 <sup>b</sup>     | (Hong et al., 2018)      |
| Brno, Czech Republic                 | 17  | July–Aug 2010      | PAS (PUF)                | $\Sigma\alpha,\beta,\gamma,\delta$ : 7.8 (M) (1.7–1500)  |                        | N/A                   | (Melymuk et al., 2016)   |
|                                      | 20  | Feb–Mar 2011       |                          | $\Sigma\alpha,\beta,\gamma,\delta$ : 0.75 (M) (0.85–1.2) |                        | N/A                   |                          |
| Toronto, Canada                      | 70  | Mar 2010–Apr 2011  | AAS (GFF, PUF/XAD/PUF)   | N/A                                                      | 2.9 (M) (<0.41–7.22)   | N/A                   | (Shoeib et al., 2014)    |
| Brno, Czech Republic                 | 36  | Sep–Dec 2010       | PAS (PUF)                | $\Sigma\alpha,\beta,\gamma,\delta$ : 2.76 (A)            |                        | N/A                   | (Bohlin et al., 2014)    |
| Lhasa, Tibet                         | 84  | Aug 2008–July 2010 | AAS (GFF, PUF)           | $\Sigma\alpha,\beta,\gamma,\delta$ : 1.9 (A) (ND-10)     |                        | N/A                   | (Ma et al., 2017)        |
| Toronto, Ontario                     | 48  | Jun 2020–May 2021  | AAS (GFF, PUF/XAD/PUF)   | 0.40 (A) (0.18–1.34)                                     | 0.26 (A) (0.11–0.87)   | 1.5                   | this study               |
| 72 sites in Quebec                   | 86  | Nov 2019–May 2022  | PAS (XAD)                | 0.22 (A) (<0.10–1.21)                                    | 0.22 (A) (<0.13–0.99)  | 1.0                   |                          |
| 46 sites in BC                       | 78  | Jan 2020–Apr 2022  | PAS (XAD)                | 0.54 (A) (<0.10–2.22)                                    | 0.46 (A) (<0.13–2.11)  | 1.2                   |                          |
| <b>Outdoor air in remote regions</b> |     |                    |                          |                                                          |                        |                       |                          |
| Saturna Island, BC                   | 11  | Dec 2019–Nov 2020  | AAS (GFF, PUF/XAD/PUF)   | 0.07 (A) (ND–0.14)                                       | 0.03 (A) (ND–0.12)     | 2.3                   | this study               |
| Tadoussac, QC                        | 12  | Dec 2020–Nov 2021  | AAS (GFF, PUF/XAD/PUF)   | 0.13 (A) (ND–0.29)                                       | 0.08 (A) (ND–0.17)     | 1.5                   |                          |
| King George Island, Antarctica       | N/A | 2011–2018          | AAS (GFF, PUF)           | (ND–0.39)                                                | (ND–0.21)              | ND-1.9                | (Zhao et al., 2020)      |
| Longyearbyen, Svalbard <sup>a</sup>  | 3   | 2015–2017          | PAS (Silicone rubber)    | 48 (A) (29–65)                                           | 31 (B) (17–46)         | 1.6                   | (Carlsson et al., 2018)  |
| <b>Indoor Air</b>                    |     |                    |                          |                                                          |                        |                       |                          |
| Stockholm, Sweden, Office            | 23  | Apr 2014–May 2015  | AAS (GFF, 2 PUFs)        | 13 (M) (7.4–22)                                          | 8.5 (M) (5.8–16)       | 1.5                   | (Wong et al., 2018)      |
| Offices, homes, stores, schools      | 48  | Feb–May 2012       | AAS (GFF, 2 PUFs)        | 36 (M) (<3.5–510)                                        | 19 (M) (<2.8–270)      | 1.9                   | (Newton et al., 2015)    |
| Birmingham, UK, Homes                | 15  | Feb–May 2015       | PAS (PUF, GFF)           | 99 (A) (17–350)                                          | 74 (A) (13–250)        | 1.3                   | (Tao et al., 2016)       |
|                                      | 20  |                    |                          | 180 (A) (74–440)                                         | 140 (A) (41–300)       | 1.3                   |                          |
| Computer repair, Izmir, Turkey       | 15  | Mar–Jun 2016       | PAS & AAS (PUF)          | 564 (A)                                                  | 375 (A)                | 1.5                   | (Genisoglu et al., 2019) |
| Brno, Czech Republic, Homes          | 17  | July–Aug 2010      | PAS (PUF)                | $\Sigma\alpha,\beta,\gamma,\delta$ : 32 (M) (6.5–1900)   |                        | N/A                   | (Melymuk et al., 2016)   |
|                                      | 20  | Feb–Mar 2011       |                          | $\Sigma\alpha,\beta,\gamma,\delta$ : 20 (M) (7.7–530)    |                        | N/A                   |                          |
| Oslo, Norway, Living rooms           | 47  | Jan–May 2012       | AAS (Quartz filter, PUF) | $\Sigma\alpha,\beta$ : 222 (A) (77.9–4120)               |                        | N/A                   | (Cequier et al., 2014)   |
| Classrooms                           | 6   |                    |                          | $\Sigma\alpha,\beta$ : 104 (A) (104–399)                 |                        | N/A                   |                          |
| Beijing, China, Offices,             | 36  | Spring-summer 2013 | PAS, AAS (GFF, PUF)      | $\Sigma\alpha,\beta$ : (<0.16–82)                        |                        | N/A                   | (Newton et al., 2016)    |

<sup>a</sup> The concentrations reported for the sampling site in Longyearbyen, Svalbard, are two to three orders of magnitude higher than at the other two remote sampling sites and two order of magnitudes higher than most urban sites. This has been attributed to a local unidentified source (Carlsson et al., 2018).

<sup>b</sup> The measurement at the electronic waste processing site in China is the only one that reports a higher abundance of  $\beta$ -TBECH than  $\alpha$ -TBECH. The high temperatures involved with e-waste dismantling may potentially have skewed the ratio through thermal interconversion (Arsenault et al., 2008).

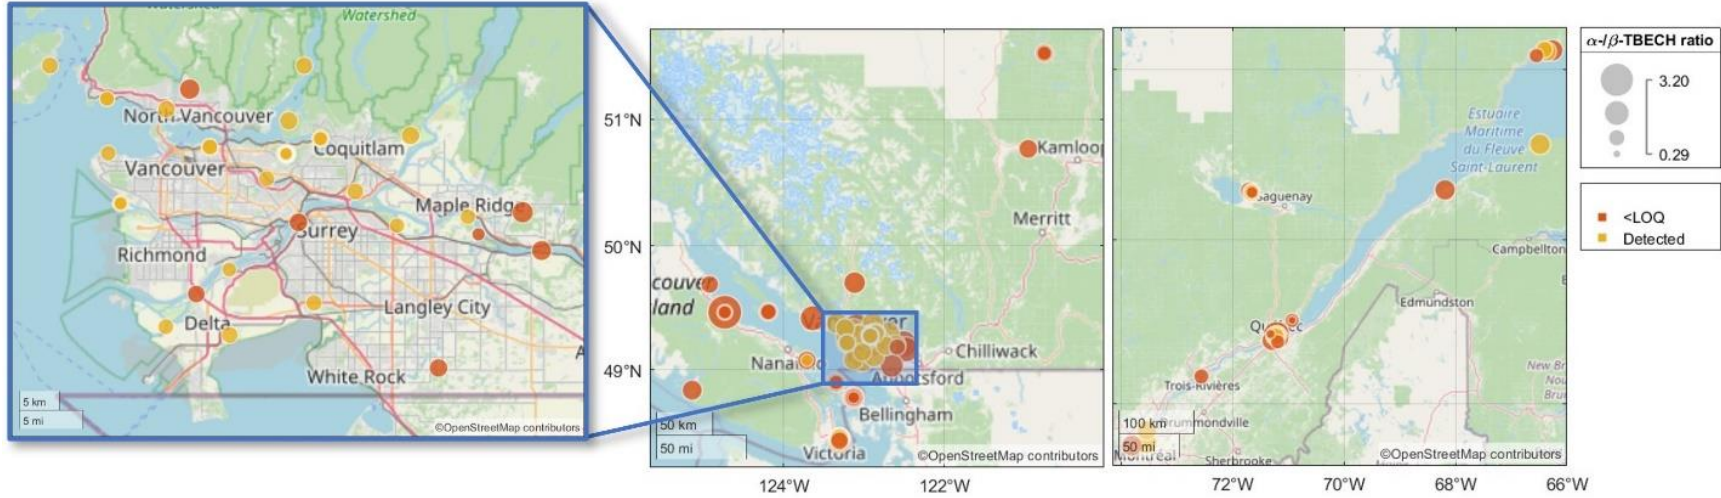

Figure S3 The spatial distribution of the atmospheric  $\alpha/\beta$ -TBECH ratios in the PAS sites in British Columbia (middle) and Quebec (right). A close-up map of the Vancouver metropolitan area of British Columbia is shown (left) for a detailed view of the clustered sites. To calculate the ratio, only measurements that were the LOD of both isomers were used, including measurements that were above the LOD but below the LOQ. TBECH concentrations with at least one isomer below the LOQ are marked on the map as <LOQ.

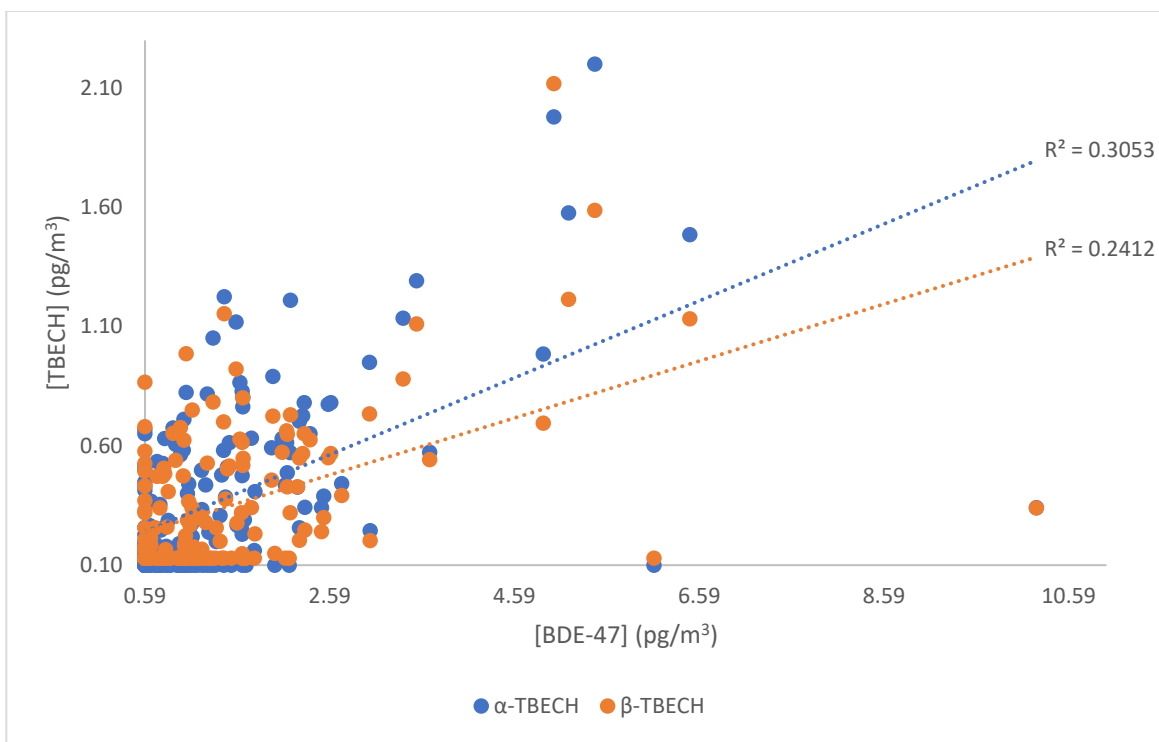

Figure S4 The relationship between the air concentration of  $\alpha$ - and  $\beta$ -TBECH and BDE-47 in the British Columbia and Quebec PAS sites. Air concentration measurements of the chemicals that were below the LOD were given a value of the LOD when plotted.

Table S14 The linear regression parameters for Figure S4.

|                 |            | <b>Coefficient</b> | <b>Std. error</b> | <b>t</b> | <b>P</b> | <b>(Adjusted) R<sup>2</sup></b> | <b>Significance F</b> |
|-----------------|------------|--------------------|-------------------|----------|----------|---------------------------------|-----------------------|
| $\alpha$ -TBECH | Intercept  | 0.15               | 0.036             | 4.07     | <0.0001  | (0.30) 0.31                     | <0.0001               |
|                 | x-variable | 0.16               | 0.019             | 8.57     | <0.0001  |                                 |                       |
| $\beta$ -TBECH  | Intercept  | 0.17               | 0.031             | 5.44     | <0.0001  | (0.24) 0.24                     | <0.0001               |
|                 | x-variable | 0.12               | 0.016             | 7.29     | <0.0001  |                                 |                       |



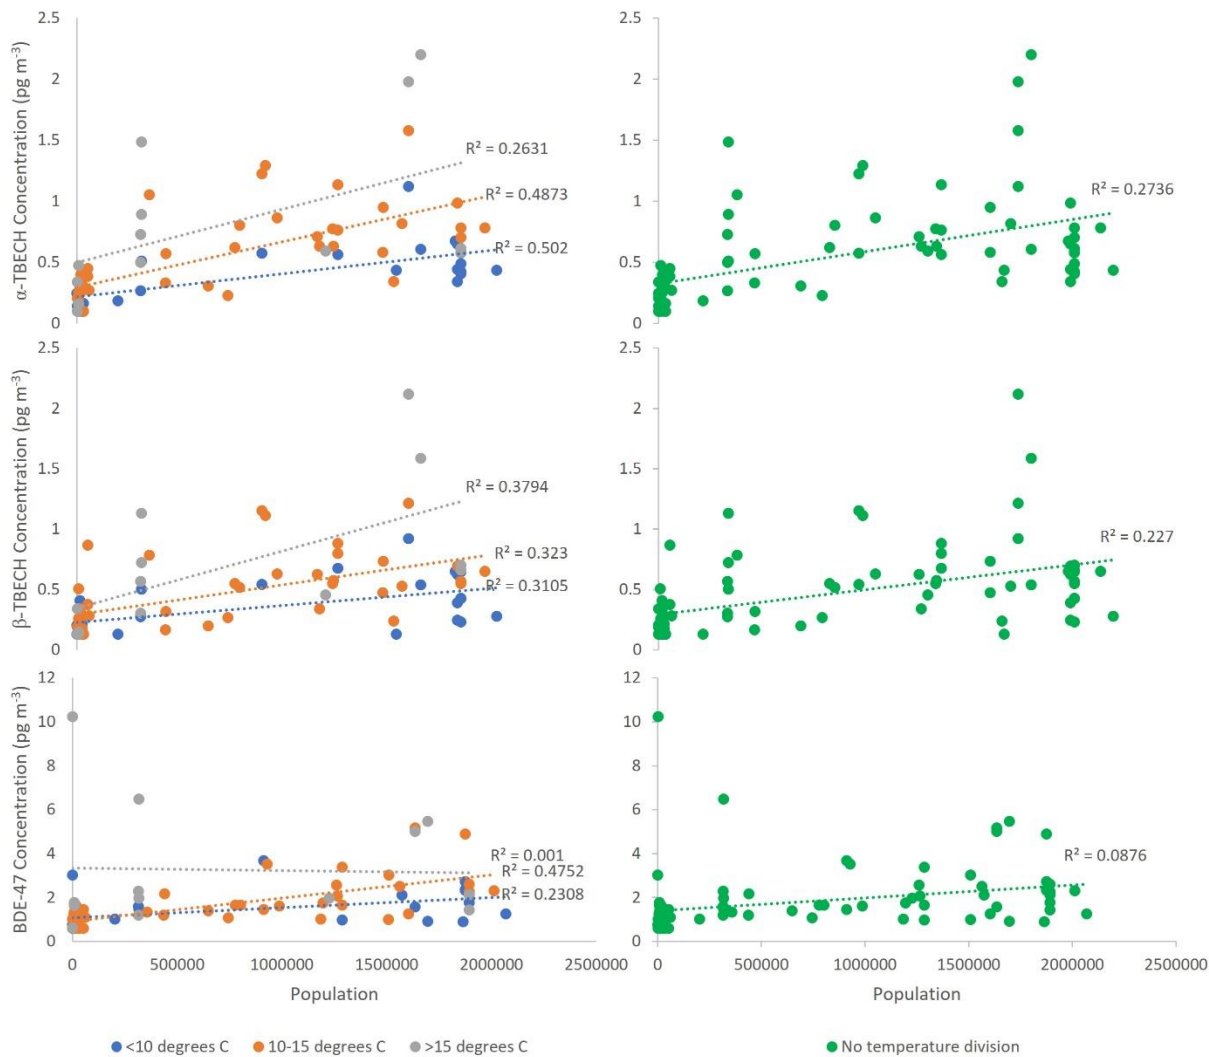

Figure S5 The relationship between the air concentration of α-TBECH (top), β-TBECH (middle), and BDE-47 (bottom) in the British Columbia PAS sites and the population in a 20-km radius around the sites. Sites were divided based on the average air temperature during their deployment length (left) and compared to the overall sample set (right) for each chemical.

Table S15 The linear regression parameters for Figure S5

|                                                                                                  |                           | Coefficient              | Std. error              | t     | P       | (Adjusted) R <sup>2</sup> | Significance F |
|--------------------------------------------------------------------------------------------------|---------------------------|--------------------------|-------------------------|-------|---------|---------------------------|----------------|
| <i>All sampling seasons (x-variable: population; y-variable: volumetric concentration; n=83)</i> |                           |                          |                         |       |         |                           |                |
| α-TBECH                                                                                          | Intercept                 | 0.32                     | 0.056                   | 5.82  | <0.0001 | (0.26) 0.27               | <0.0001        |
|                                                                                                  | x-variable                | 2.80 x 10 <sup>-7</sup>  | 5.07 x 10 <sup>-8</sup> | 5.52  | <0.0001 |                           |                |
| β-TBECH                                                                                          | Intercept                 | 0.29                     | 0.049                   | 5.98  | <0.0001 | (0.22) 0.23               | <0.0001        |
|                                                                                                  | x-variable                | 2.18 x 10 <sup>-7</sup>  | 4.48 x 10 <sup>-8</sup> | 4.88  | <0.0001 |                           |                |
| BDE-47                                                                                           | Intercept                 | 1.40                     | 0.23                    | 6.11  | <0.0001 | (0.076) 0.088             | 0.0066         |
|                                                                                                  | x-variable                | 5.84 x 10 <sup>-7</sup>  | 2.09 x 10 <sup>-7</sup> | 2.79  | 0.0066  |                           |                |
| <i>&lt;10°C (x-variable: population; y-variable: volumetric concentration; n=27)</i>             |                           |                          |                         |       |         |                           |                |
| α-TBECH                                                                                          | Intercept                 | 0.22                     | 0.047                   | 4.64  | <0.0001 | (0.48) 0.50               | <0.0001        |
|                                                                                                  | x-variable                | 1.86 x 10 <sup>-7</sup>  | 3.70 x 10 <sup>-8</sup> | 5.02  | <0.0001 |                           |                |
| β-TBECH                                                                                          | Intercept                 | 0.23                     | 0.052                   | 4.36  | 0.00020 | (0.28) 0.31               | 0.0025         |
|                                                                                                  | x-variable                | 1.38 x 10 <sup>-7</sup>  | 4.13 x 10 <sup>-8</sup> | 3.36  | 0.0025  |                           |                |
| BDE-47                                                                                           | Intercept                 | 1.07                     | 0.22                    | 4.95  | <0.0001 | (0.20) 0.23               | 0.011          |
|                                                                                                  | x-variable                | 4.67 x 10 <sup>-7</sup>  | 1.70 x 10 <sup>-7</sup> | 2.74  | 0.011   |                           |                |
| <i>10-15°C (x-variable: population; y-variable: volumetric concentration; n=43)</i>              |                           |                          |                         |       |         |                           |                |
| α-TBECH                                                                                          | Intercept                 | 0.29                     | 0.058                   | 5.06  | <0.0001 | (0.47) 0.49               | <0.0001        |
|                                                                                                  | x-variable                | 3.69 x 10 <sup>-7</sup>  | 5.91 x 10 <sup>-8</sup> | 6.24  | <0.0001 |                           |                |
| β-TBECH                                                                                          | Intercept                 | 0.29                     | 0.054                   | 5.44  | <0.0001 | (0.31) 0.32               | <0.0001        |
|                                                                                                  | x-variable                | 2.42 x 10 <sup>-7</sup>  | 5.47 x 10 <sup>-8</sup> | 4.42  | <0.0001 |                           |                |
| BDE-47                                                                                           | Intercept                 | 0.92                     | 0.17                    | 5.35  | <0.0001 | (0.46) 0.48               | <0.0001        |
|                                                                                                  | x-variable                | 1.06 x 10 <sup>-6</sup>  | 1.74 x 10 <sup>-7</sup> | 6.09  | <0.0001 |                           |                |
| <i>&gt;15°C (x-variable: population; y-variable: volumetric concentration; n=13)</i>             |                           |                          |                         |       |         |                           |                |
| α-TBECH                                                                                          | Intercept                 | 0.50                     | 0.23                    | 2.18  | 0.052   | (0.20) 0.26               | 0.073          |
|                                                                                                  | x-variable                | 4.30 x 10 <sup>-7</sup>  | 2.17 x 10 <sup>-7</sup> | 1.98  | 0.073   |                           |                |
| β-TBECH                                                                                          | Intercept                 | 0.35                     | 0.19                    | 1.81  | 0.097   | (0.32) 0.38               | 0.025          |
|                                                                                                  | x-variable                | 4.67 x 10 <sup>-7</sup>  | 1.80 x 10 <sup>-7</sup> | 2.59  | 0.025   |                           |                |
| BDE-47                                                                                           | Intercept                 | 3.33                     | 1.12                    | 2.97  | 0.013   | (-0.090)<br>0.001         | 0.92           |
|                                                                                                  | x-variable                | -1.10 x 10 <sup>-7</sup> | 1.06 x 10 <sup>-6</sup> | -0.11 | 0.92    |                           |                |
| <i>Two x-variables: population in 20-km radius and 1/AAT; y-variable: Ln(P); n=83</i>            |                           |                          |                         |       |         |                           |                |
| α-TBECH                                                                                          | Intercept                 | -3.27                    | 4.41                    | -0.74 | 0.46    | (0.56) 0.57               | <0.0001        |
|                                                                                                  | x-variable 1 (population) | 6.92 x 10 <sup>-7</sup>  | 7.30 x 10 <sup>-8</sup> | 9.47  | <0.0001 |                           |                |
|                                                                                                  | x-variable 2 (1/AAT)      | -6860.43                 | 1260.51                 | -5.44 | <0.0001 |                           |                |
| β-TBECH                                                                                          | Intercept                 | -8.13                    | 4.78                    | -1.70 | 0.093   | (0.42) 0.43               | <0.0001        |
|                                                                                                  | x-variable 1 (population) | 5.82 x 10 <sup>-7</sup>  | 7.91 x 10 <sup>-8</sup> | 7.35  | <0.0001 |                           |                |
|                                                                                                  | x-variable 2 (1/AAT)      | -5489.59                 | 1365.92                 | -4.02 | 0.00013 |                           |                |
| BDE-47                                                                                           | Intercept                 | -9.23                    | 4.54                    | -2.03 | 0.045   | (0.34) 0.36               | <0.0001        |
|                                                                                                  | x-variable 1 (population) | 4.59 x 10 <sup>-7</sup>  | 7.52 x 10 <sup>-8</sup> | 6.11  | <0.0001 |                           |                |
|                                                                                                  | x-variable 2 (1/AAT)      | -4782.41                 | 1297.21                 | -3.69 | 0.00041 |                           |                |

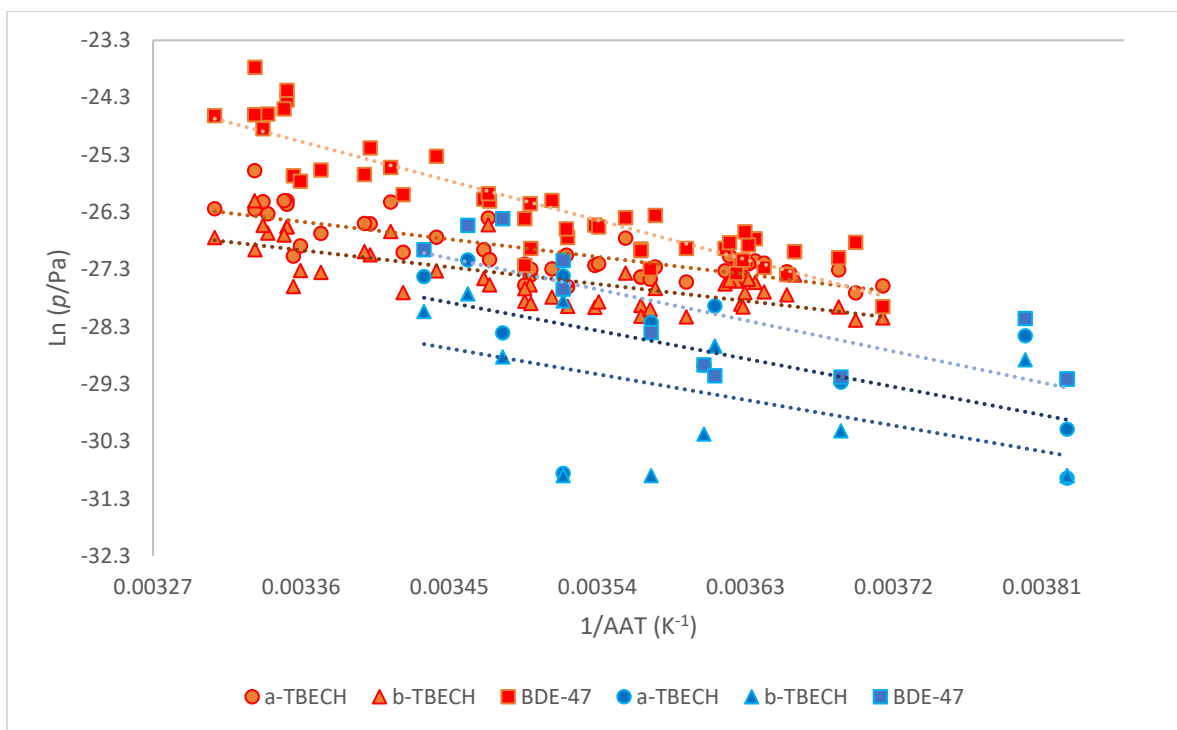

Figure S6 The temperature dependence of the air concentrations of  $\alpha$ -TBECH (circle),  $\beta$ -TBECH (triangle), and BDE-47 (square) in Scarborough, ON (orange) and Tadoussac, QC (blue).

Table S16 The linear regression parameters for Figure S6

|                                                                        |            | Coefficient | Std. error | t      | P       | (Adjusted) R <sup>2</sup> | Significance F |
|------------------------------------------------------------------------|------------|-------------|------------|--------|---------|---------------------------|----------------|
| <i>Toronto, ON (single x-variable: 1/AAT; y-variable: Ln(P); n=48)</i> |            |             |            |        |         |                           |                |
| $\alpha$ -TBECH                                                        | Intercept  | -15.01      | 1.39       | -10.80 | <0.0001 | (0.61) 0.61               | <0.0001        |
|                                                                        | x-variable | -3408.32    | 395.93     | -8.61  | <0.0001 |                           |                |
| $\beta$ -TBECH                                                         | Intercept  | -15.93      | 1.53       | -10.38 | <0.0001 | (0.54) 0.55               | <0.0001        |
|                                                                        | x-variable | -3283.00    | 437.06     | -7.512 | <0.0001 |                           |                |
| BDE-47                                                                 | Intercept  | 0.53        | 1.91       | 0.28   | 0.78    | (0.81) 0.81               | <0.0001        |
|                                                                        | x-variable | -7618.84    | 545.15     | -13.98 | <0.0001 |                           |                |
| <i>Saturna Island, BC (x-variable: 1/AAT; y-variable: Ln(P); n=11)</i> |            |             |            |        |         |                           |                |
| $\alpha$ -TBECH                                                        | Intercept  | -28.58      | 20.85      | -1.37  | 0.20    | (-0.11)                   | 0.98           |
|                                                                        | x-variable | -128.00     | 5909.27    | -0.022 | 0.98    |                           |                |
| $\beta$ -TBECH                                                         | Intercept  | -19.72      | 19.06      | -1.03  | 0.33    | (-0.08)                   | 0.61           |
|                                                                        | x-variable | -2847.55    | 5404.12    | -0.53  | 0.61    |                           |                |
| BDE-47                                                                 | Intercept  | 1.74        | 10.83      | 0.16   | 0.88    | (0.37) 0.44               | 0.027          |
|                                                                        | x-variable | -8114.23    | 3069.38    | -2.64  | 0.027   |                           |                |
| <i>Tadoussac, QC (x-variable: 1/AAT; y-variable: Ln(P); n=12)</i>      |            |             |            |        |         |                           |                |
| $\alpha$ -TBECH                                                        | Intercept  | -9.08       | 8.44       | -1.08  | 0.31    | (0.29) 0.35               | 0.042          |
|                                                                        | x-variable | -5447.27    | 2334.11    | -2.33  | 0.042   |                           |                |
| $\beta$ -TBECH                                                         | Intercept  | -11.49      | 8.67       | -1.33  | 0.21    | (0.23) 0.30               | 0.064          |
|                                                                        | x-variable | -4982.64    | 2398.45    | -2.08  | 0.064   |                           |                |
| BDE-47                                                                 | Intercept  | -6.33       | 5.56       | -1.14  | 0.28    | (0.57) 0.60               | 0.003          |
|                                                                        | x-variable | -6020.33    | 1538.73    | -3.91  | 0.003   |                           |                |

Text S7 Investigating the influence of wind on the concentrations of BFRs measured during active air sampling (AAS) in Toronto

Hourly wind direction and speed measurements were provided by the University of Toronto Scarborough during each sampling period. Each wind direction measurement was divided into three categories: originated from rural areas (rural winds), originated from Lake Ontario (lake winds), and originated from the Toronto urban centre (urban winds), which are shown in Figure S7. In this study, an urban wind fraction UWF is defined as a fraction of the number of wind direction measurements originating from the Toronto urban centre over the total number of wind measurements in the sampling period.

To investigate whether the wind originating from the Toronto urban centre was a factor affecting the concentration of the BFRs, the logarithm of the partial pressure  $\ln(P)$   $\alpha$ - and  $\beta$ -TBECH and BDE-47 was regressed with UWF and reciprocal air temperature (Table S17).

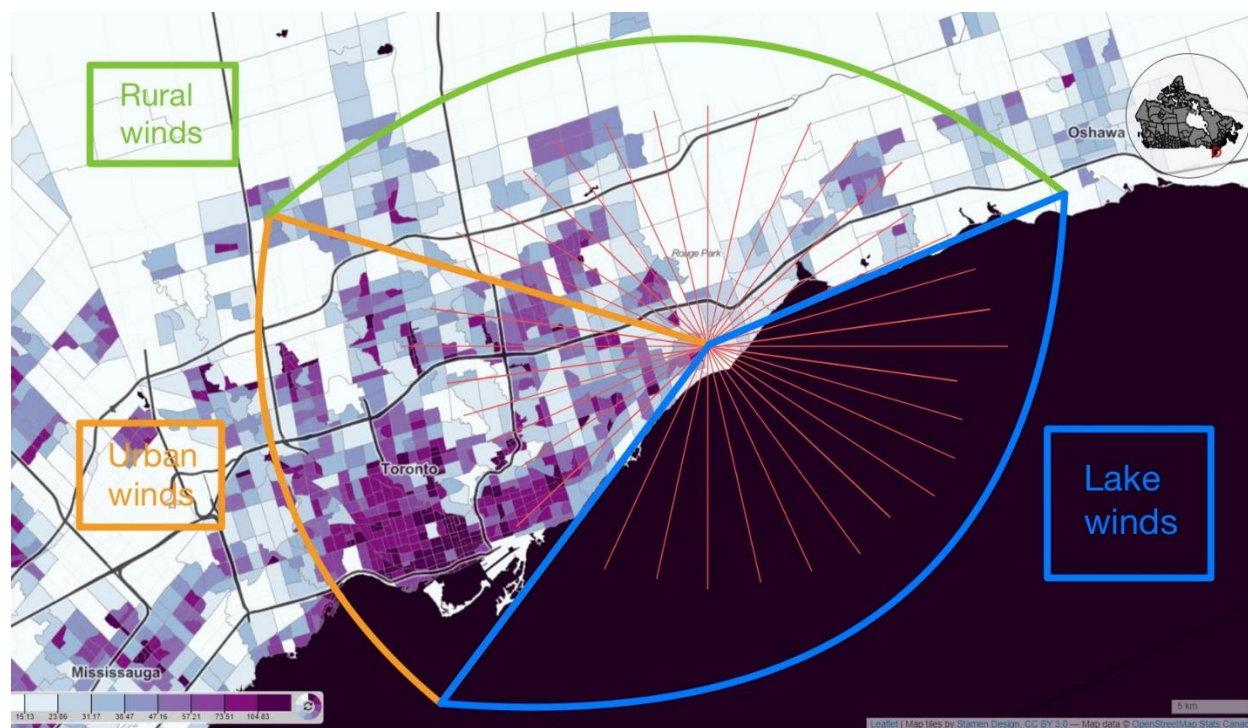

Figure S7 The population density map of the Greater Toronto Area (GTA) with the detailed division of the wind origin arriving at Scarborough, ON, centered at the AAS station. Population density map was provided by CensusMapper, using data released by Statistics Canada.

Table S17 Multiple linear regression parameters for relationships between the logarithm of the partial pressure of a BFR in Toronto, ON ( $\ln(p/\text{Pa})$ ), and reciprocal temperature ( $1/\text{AAT}$ ) and a wind fraction (XWF, X=U Urban, R Rural, L Lake). Number of datapoints is 48.

|                                  |           | Coefficient | Std. error | t      | P       | (Adjusted) R <sup>2</sup> | Significance F |
|----------------------------------|-----------|-------------|------------|--------|---------|---------------------------|----------------|
| <b>Urban Wind Fraction (UWF)</b> |           |             |            |        |         |                           |                |
| $\alpha$ -TBECH                  | Intercept | -14.75      | 1.28       | -11.52 | <0.0001 | (0.67) 0.68               | <0.0001        |
|                                  | 1/AAT     | -3547.00    | 366.74     | -9.67  | <0.0001 |                           |                |
|                                  | UWF/speed | 7.05        | 2.29       | 3.07   | 0.0036  |                           |                |
| $\beta$ -TBECH                   | Intercept | -15.58      | 1.35       | -11.56 | <0.0001 | (0.65) 0.66               | <0.0001        |
|                                  | 1/AAT     | -3466.18    | 386.07     | -8.98  | <0.0001 |                           |                |
|                                  | UWF/speed | 9.31        | 2.42       | 3.85   | 0.00037 |                           |                |
| BDE-47                           | Intercept | 0.71        | 1.90       | 0.37   | 0.71    | (0.81) 0.82               | <0.0001        |
|                                  | 1/AAT     | -7710.29    | 544.24     | -14.17 | <0.0001 |                           |                |
|                                  | UWF/speed | 4.65        | 3.41       | 1.37   | 0.18    |                           |                |
| <b>Rural Wind Fraction (RWF)</b> |           |             |            |        |         |                           |                |
| $\alpha$ -TBECH                  | Intercept | -15.02      | 1.40       | -10.74 | <0.0001 | (0.60) 0.62               | <0.0001        |
|                                  | 1/AAT     | -3434.86    | 400.11     | -8.58  | <0.0001 |                           |                |
|                                  | RWF/speed | 1.36        | 1.99       | 0.68   | 0.50    |                           |                |
| $\beta$ -TBECH                   | Intercept | -15.93      | 1.55       | -10.28 | <0.0001 | (0.53) 0.55               | <0.0001        |
|                                  | 1/AAT     | -3293.32    | 443.69     | -7.42  | <0.0001 |                           |                |
|                                  | RWF/speed | 0.53        | 2.21       | 0.24   | 0.81    |                           |                |
| BDE-47                           | Intercept | 0.53        | 1.93       | 0.28   | 0.78    | (0.81) 0.80               | <0.0001        |
|                                  | 1/AAT     | -7598.10    | 552.85     | -13.74 | <0.0001 |                           |                |
|                                  | RWF/speed | -1.07       | 2.75       | -0.39  | 0.70    |                           |                |
| <b>Lake Wind Fraction (LWF)</b>  |           |             |            |        |         |                           |                |
| $\alpha$ -TBECH                  | Intercept | -14.52      | 1.75       | -8.28  | <0.0001 | (0.60) 0.61               | <0.0001        |
|                                  | 1/AAT     | -3536.22    | 483.68     | -7.31  | <0.0001 |                           |                |
|                                  | LWF/speed | -0.75       | 1.60       | -0.47  | 0.64    |                           |                |
| $\beta$ -TBECH                   | Intercept | -16.69      | 1.93       | -8.65  | <0.0001 | (0.53) 0.56               | <0.0001        |
|                                  | 1/AAT     | -3085.13    | 532.67     | -5.79  | <0.0001 |                           |                |
|                                  | LWF/speed | 1.16        | 1.76       | 0.66   | 0.51    |                           |                |
| BDE-47                           | Intercept | 0.90        | 2.42       | 0.37   | 0.71    | (0.81) 0.80               | <0.0001        |
|                                  | 1/AAT     | -7714.83    | 667.11     | -11.56 | <0.0001 |                           |                |
|                                  | LWF/speed | -0.56       | 2.20       | -0.26  | 0.80    |                           |                |

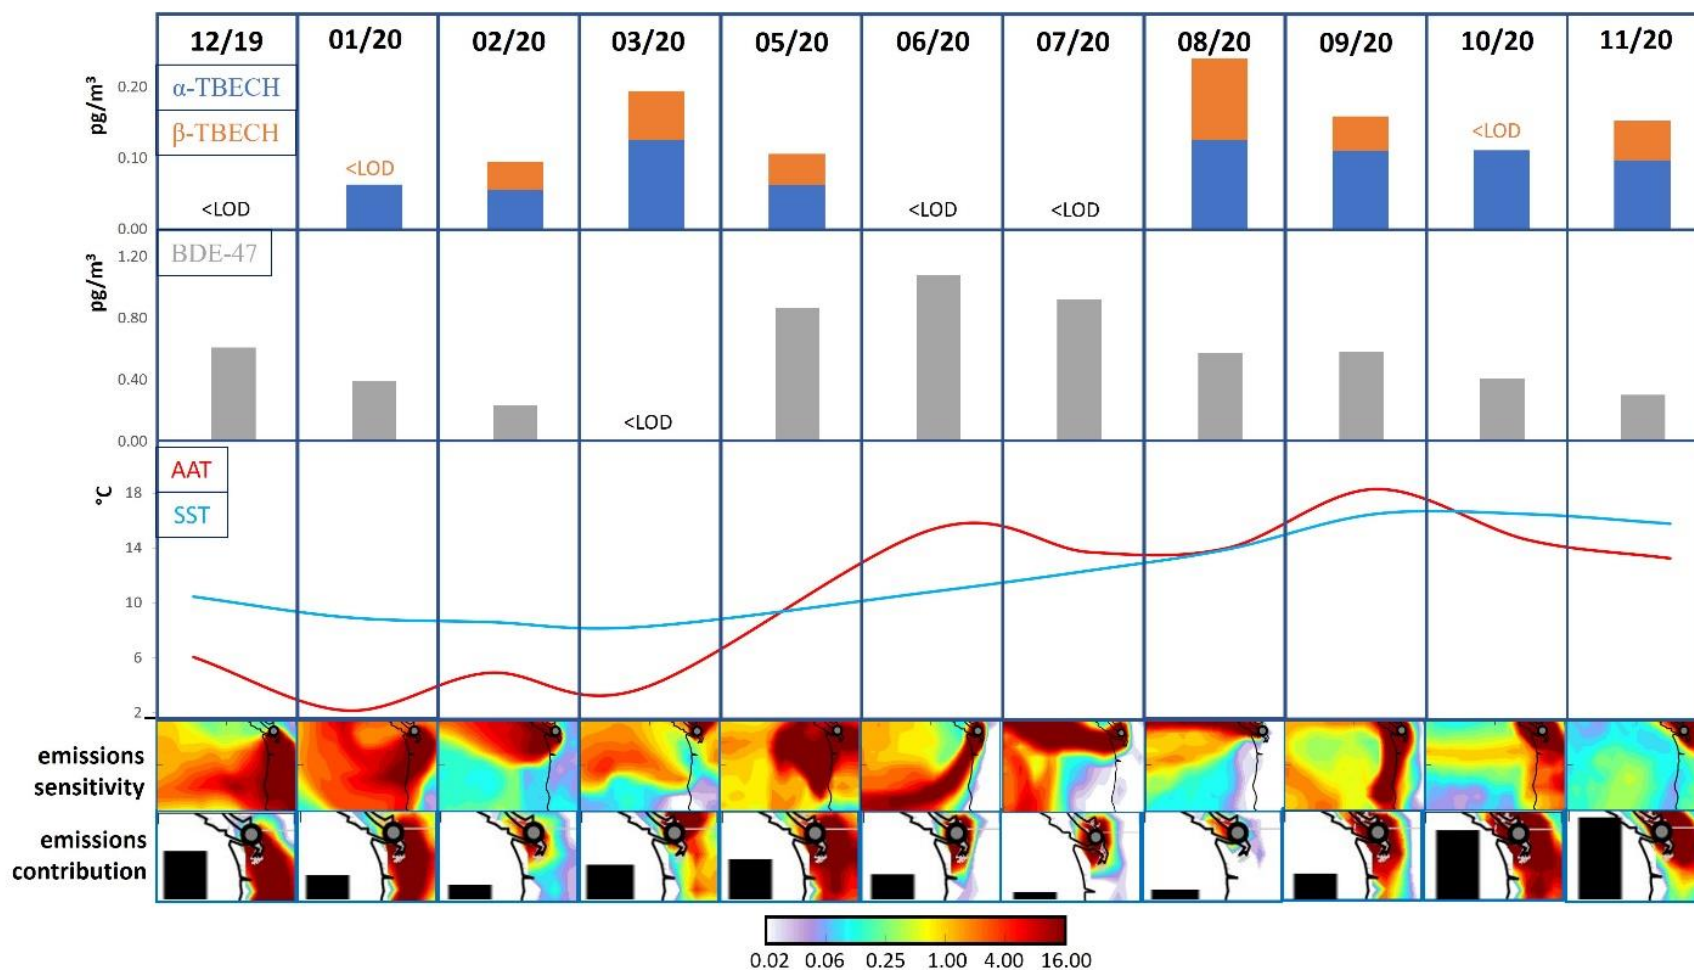

Figure S8 Air concentration (gas phase only) of  $\alpha$ - and  $\beta$ -TBECH (stacked) and BDE-47 on Saturna Island, BC (top) and the average surface sea (SST) and air temperature (AAT) taken during each sampling period (middle). The maps of FLEXPART (bottom) show the emissions sensitivity (ES) and emissions contribution (EC) of the BC region during each sampling period, with units of  $\text{ns m}^{-2}$  and  $\text{ng m}^{-3} \text{m}^{-2}$ , respectively. The black bars overlaid on the EC FLEXPART maps indicate the relative model-predicted average air concentration of CO at the measurement site during the sampling period.



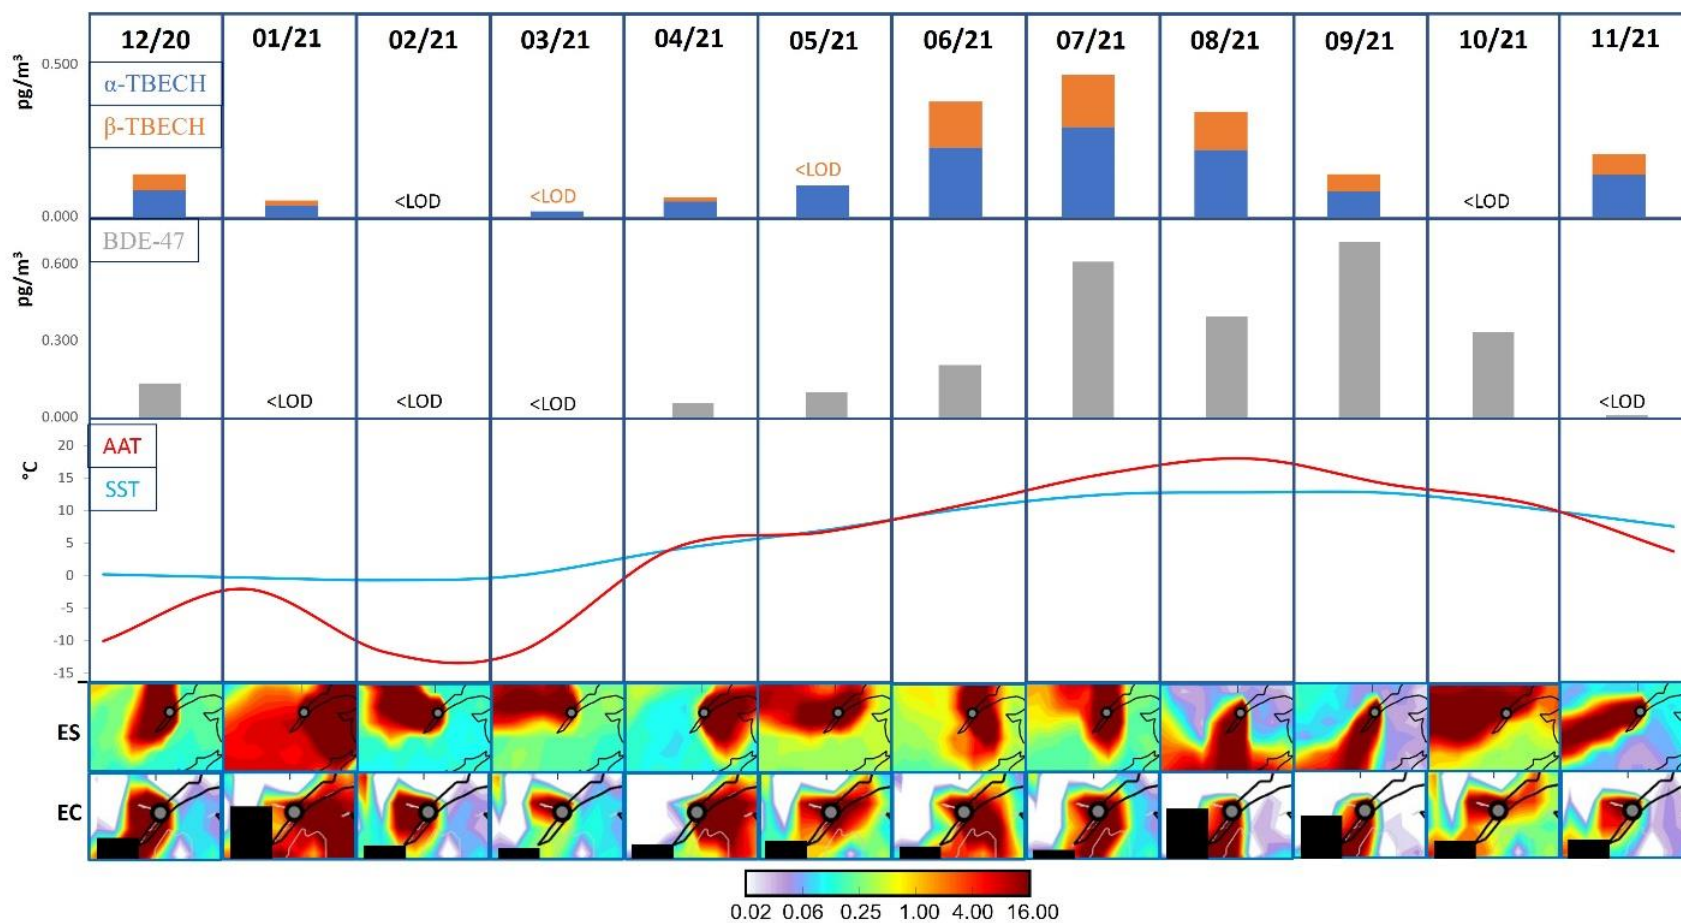

Figure S9 The seasonal variation of the air concentration (gas phase only) of  $\alpha$ - and  $\beta$ -TBECH (stacked) and BDE-47 in Tadoussac, QC (top) and the average surface sea (SST) and air temperature (AAT) taken during each sampling period (middle). Similar to Saturna Island, the ES and EC FLEXPART maps of Tadoussac during the sampling period are shown (bottom).

Text S8            Investigating the influence of air mass origin on the concentrations of BFRs measured during active air sampling (AAS) in Saturna Island and Tadoussac

Figures S8 and S9 display the seasonal variability in the concentration of  $\alpha$ - and  $\beta$ -TBECH and BDE-47 as measured by AAS on Saturna Island and in Tadoussac, respectively. Also shown are the average air and sea surface temperature at the two sites. In order to shed further light on the source of the variability in these concentrations, we used FLEXPART, a Lagrangian particle dispersion model (Pisso et al., 2019), to determine the history of the air masses sampled on Saturna Island, BC and Tadoussac, QC. FLEXPART was driven by global model-level meteorological data from the European Centre for Medium-Range Weather Forecasts (ECMWF) with  $1^\circ \times 1^\circ$  resolution and 3 hourly fields. The model releases 100 000 so-called tracer particles equally throughout the measurement period (24 h for BC and QC; 1 week for ON). The model was then operated backwards in time (20 days) from the starting measurement date to calculate the trajectories of these particles, accounting for the turbulence, convection, and diffusion during the time period. From these simulations, maps identifying the possible source regions were constructed, which were expressed as emission sensitivities (ES) in  $\text{ns m}^{-3}$ , i.e., the residence time normalized by the volume, in the footprint layer (0-100 m above ground level). The ES maps included in Figs. S8 and S9 therefore illustrates the probability of an air mass to take up pollutants from sources near the ground at a given location.

By multiplying the ES with the annual mean anthropogenic carbon monoxide (CO) emission inventory in the region (obtained from the ECLIPSE database), a modelled CO concentration above the background in the region can be calculated for each sampling period in the three AAS sites. Overlaying the concentrations on a map indicates the potential anthropogenic emission contribution (EC) in the region. Since CO acts like a passive tracer and is correlated with anthropogenic emissions, anthropogenic sources of TBECH and legacy BFRs would also be correlated with the CO emission. Details of the calculations and assumptions used are explained in another study (Savage et al., 2017). The EC maps are also included in Figs. S8 and S9.

The FLEXPART ES and EC maps, which indicate the origin of the air mass arriving to Saturna Island and the predicted concentration of CO at the measurement site, i.e., indicate where and how much the sampled air mass could have picked up anthropogenic emissions on its path, can be used to estimate how much anthropogenic emissions impacts the levels of BFRs in this remote region.

In the summer season (June, July, August), the air during the sampling period arrived on Saturna Island directly from the Pacific Ocean, and therefore had little contact with populated areas, which also resulted in very low predicted CO concentrations (Figure S8). This matches with the corresponding TBECH levels that were below the LOD in June and July but does not fit with the fairly high levels measured in August. The air sampled in the colder season (May, October, November, and December) had passed through populated areas (Seattle, Vancouver) and had higher predicted CO concentrations, but the TBECH levels were either in the middle or below the LOD.

Therefore, TBECH may be subjected to complex, competing influences of air mass origin and temperature: Emissions of TBECH are somewhat temperature dependent and are higher in summer and lower in winter. In the studied region, summer air comes from the Pacific Ocean and winter air from the continent. In



other words, there is a seasonal variation in the levels of TBECH and a synchronous variation in the contact of the air mass with populated regions, which interact, and to some extent, cancel each other out. However, the variation of the BDE-47 levels in Saturna Island seems to be less reliant on air mass origin, and more dependent solely on air temperature.

Furthermore, the predicted CO levels from the FLEXPART simulations (Figure S9) at times reflected the relative levels of TBECH in Tadoussac (August to November 2021). However, the air mass origin was not able to explain all variations, e.g., the highest levels of TBECH recorded (July 2021) corresponded to the lowest predicted CO level.

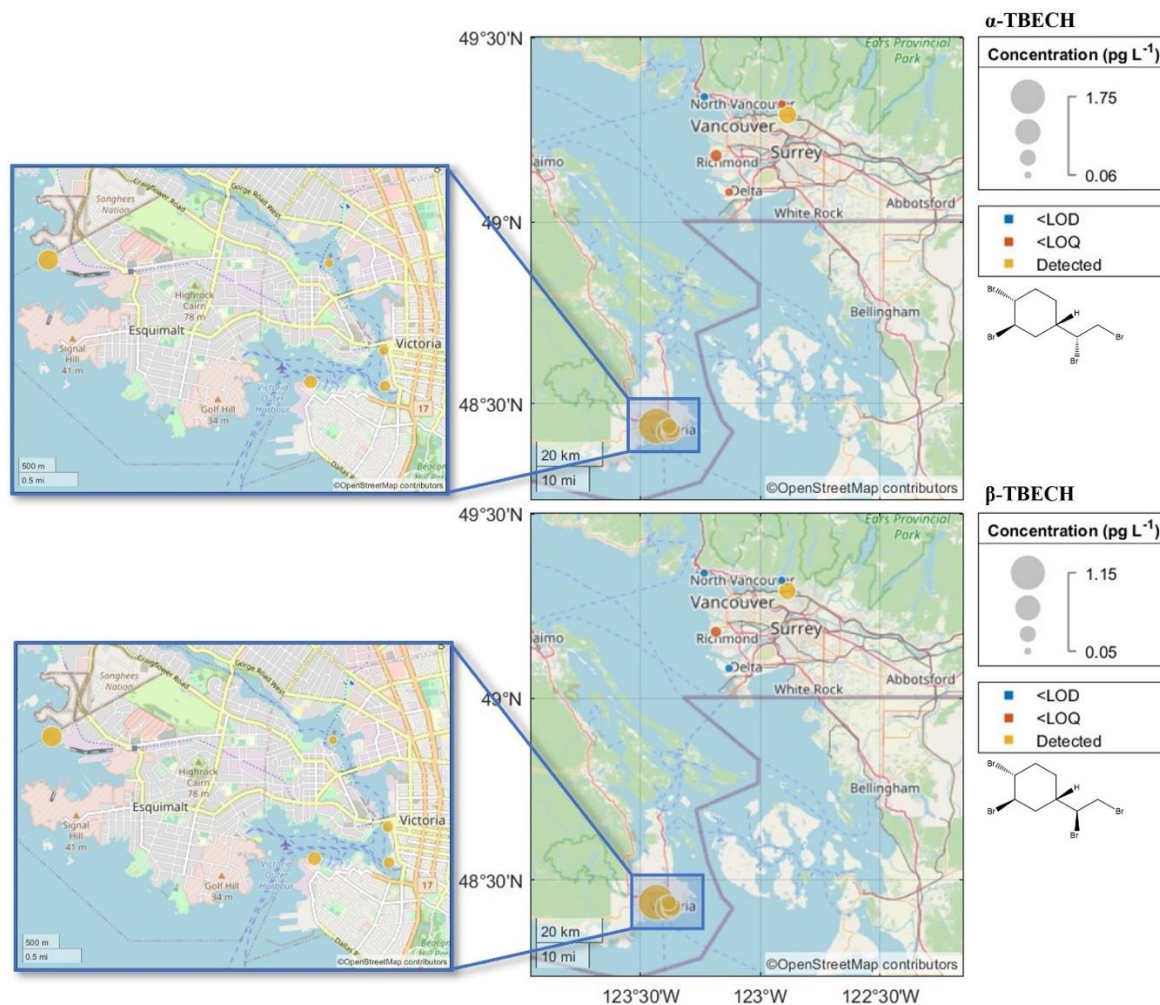

Figure S10 The spatial distribution of the water concentration of  $\alpha$ - (top) and  $\beta$ - (bottom) TBECH in British Columbia. A close-up map of Victoria is shown (left) for a detailed view of the clustered sites. For sites with multiple measurements, the average water concentration is used and displayed on the map. Measurements of the air concentrations that were below the LOD ( $\alpha$ -TBECH: 11;  $\beta$ -TBECH: 17) are marked in blue. Measurements of air concentrations that were above the LOD but could not be reliably quantified, i.e., below the LOQ ( $\alpha$ -TBECH: 3;  $\beta$ -TBECH: 4), are marked in orange. Measurements above the LOQ are marked in yellow.

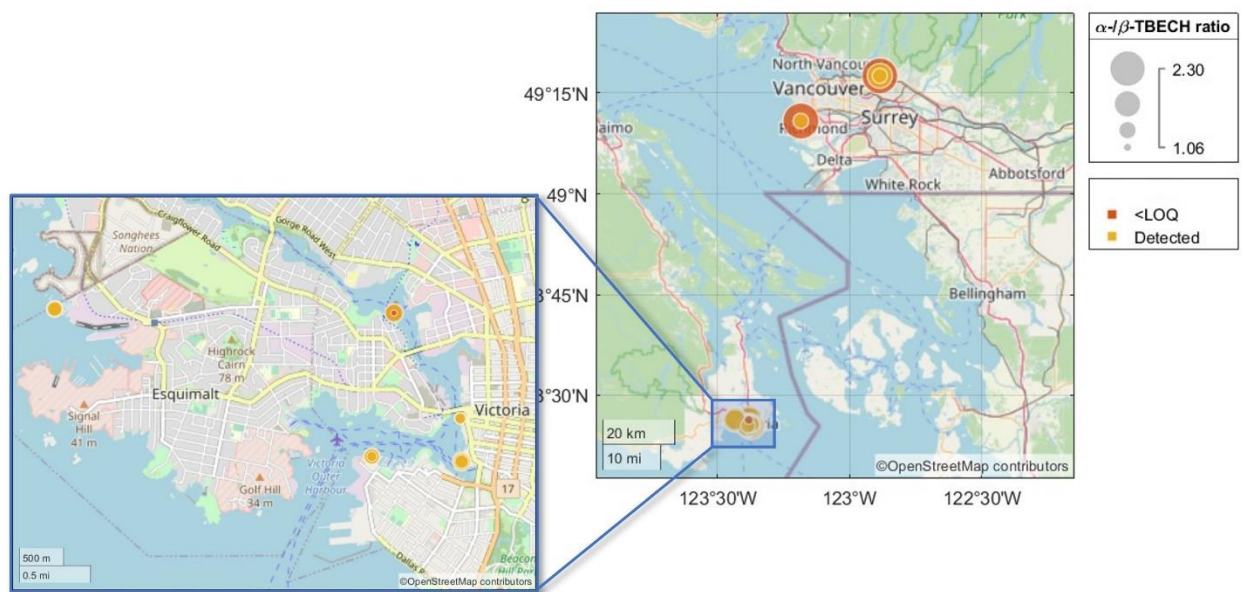

Figure S11 The spatial distribution of the  $\alpha$ - $\beta$ -TBECH ratios at the PWS sites in British Columbia. A close-up map of the Victoria is shown (left) for a detailed view of the clustered sites. To calculate the ratios, only measurements that were above the LOD for both isomers were used, including measurements that were above the LOD but below the LOQ. To distinguish their certainty, ratios that were calculated using quantifiable measurements and ratios that were calculated using at least one measurement below the LOQ are marked in yellow and orange, respectively.

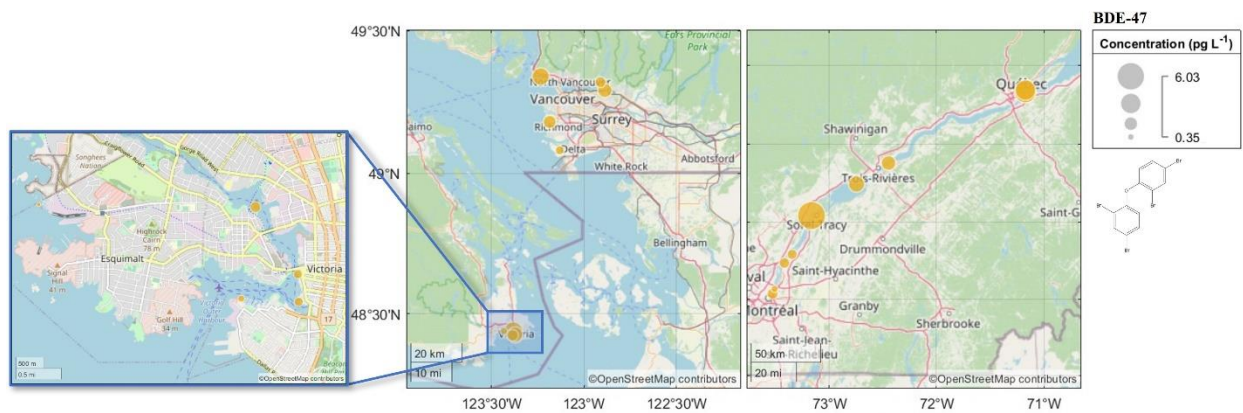

Figure S12 The spatial distribution of the water concentration of BDE-47 in British Columbia (left) and Quebec (right). A close-up map of Victoria is shown (left) for a detailed view of the clustered sites. For sites with replicate measurements, the average water concentration is used and displayed on the map.

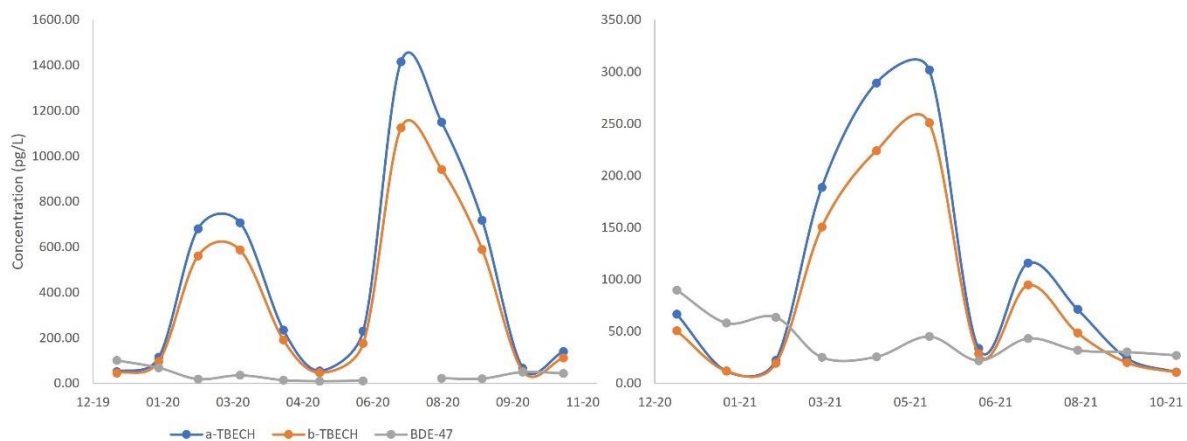

Figure S13 The seasonal variation of  $\alpha$ - and  $\beta$ -TBECH and BDE-47 concentration in precipitation samples from Saturna Island, BC (left) and Tadoussac, QC (right).

Table S18 The enantiomeric fraction (EF) of  $\alpha$ -TBECH in the air at selected BC and QC sites.

| Site name | EF    |
|-----------|-------|-----------|-------|-----------|-------|-----------|-------|
| <b>BC</b> |       | <b>BC</b> |       | <b>BC</b> |       | <b>QC</b> |       |
| L1_2      | 0.462 | L9        | 0.511 | L21       | 0.469 | S25       | 0.460 |
| L2        | 0.322 | L10       | 0.525 | L22       | 0.548 | S38       | 0.556 |
| L5_2      | 0.651 | L12       | 0.507 | L23       | 0.497 | S40       | 0.507 |
| L5_3      | 0.496 | L13_2     | 0.587 | L27       | 0.575 | S51       | 0.434 |
| L6        | 0.660 | L14       | 0.611 | L28       | 0.544 | S52       | 0.483 |
| L7        | 0.425 | L18       | 0.584 | L41_2     | 0.484 | S67       | 0.418 |
| L7_2      | 0.339 | L19       | 0.604 | L45_2     | 0.478 | S68       | 0.346 |

Table S19 The enantiomeric fraction (EF) of  $\alpha$ -TBECH in the active air samples from Toronto.

| Sample | Date       | EF    | Sample | Date       | EF    | Sample | Date       | EF    |
|--------|------------|-------|--------|------------|-------|--------|------------|-------|
| AAS1   | 2020-06-24 | 0.588 | AAS14  | 2020-09-23 | 0.579 | AAS29  | 2021-01-06 | 0.630 |
| AAS2   | 2020-07-01 | 0.564 | AAS15  | 2020-09-30 | 0.521 | AAS30  | 2021-01-13 | 0.536 |
| AAS3   | 2020-07-08 | 0.714 | AAS16  | 2020-10-07 | 0.521 | AAS31  | 2021-01-20 | 0.541 |
| AAS4   | 2020-07-15 | 0.529 | AAS17  | 2020-10-14 | 0.552 | AAS32  | 2021-01-27 | 0.528 |
| AAS5   | 2020-07-22 | 0.532 | AAS18  | 2020-10-21 | 0.669 | AAS34  | 2021-02-10 | 0.687 |
| AAS6   | 2020-07-29 | 0.509 | AAS19  | 2020-10-28 | 0.556 | AAS35  | 2021-02-17 | 0.651 |
| AAS7   | 2020-08-05 | 0.549 | AAS20  | 2020-11-04 | 0.629 | AAS36  | 2021-02-24 | 0.640 |
| AAS8   | 2020-08-12 | 0.521 | AAS22  | 2020-11-18 | 0.676 | AAS37  | 2021-03-03 | 0.595 |
| AAS9   | 2020-08-19 | 0.514 | AAS23  | 2020-11-25 | 0.604 | AAS38  | 2021-03-10 | 0.525 |
| AAS10  | 2020-08-26 | 0.511 | AAS24  | 2020-12-02 | 0.628 | AAS39  | 2021-03-17 | 0.516 |
| AAS11  | 2020-09-02 | 0.600 | AAS26  | 2020-12-16 | 0.440 | AAS40  | 2021-03-24 | 0.533 |
| AAS13  | 2020-09-16 | 0.570 | AAS27  | 2020-12-23 | 0.665 | AAS41  | 2021-03-31 | 0.540 |

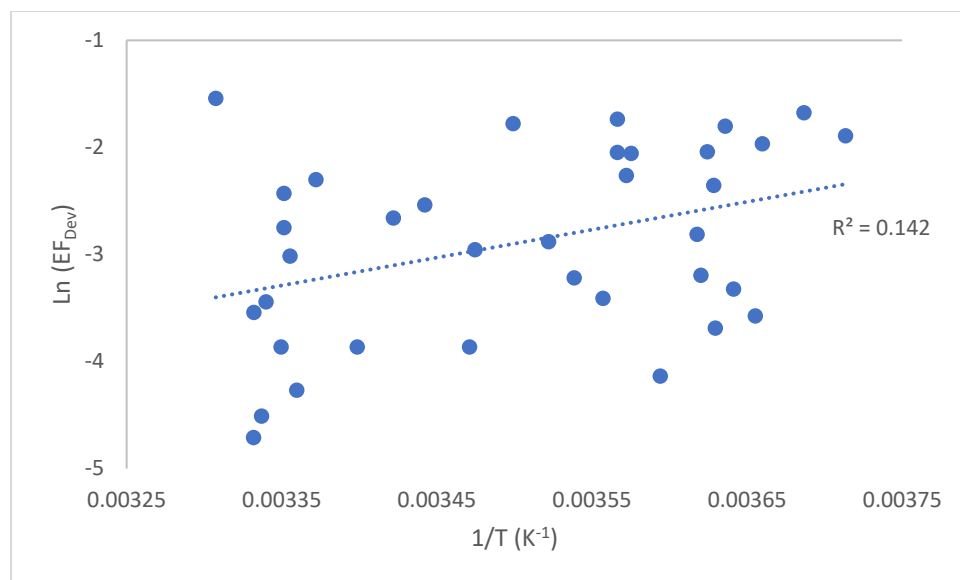

Figure S14 The temperature dependence of the EF deviation from 0.50 ( $EF_{dev}$ ) in Toronto air.

Table S20 The linear regression parameters for Figure S14.

|                 |            | Coefficient | Std. error | t     | P      | (Adjusted) R <sup>2</sup> | Significance F |
|-----------------|------------|-------------|------------|-------|--------|---------------------------|----------------|
| $\alpha$ -TBECH | Intercept  | -12.01      | 3.85       | -3.12 | 0.0037 | (0.12) 0.14               | 0.023          |
|                 | x-variable | 2603.51     | 1097.58    | 2.37  | 0.023  |                           |                |

Table S21 The enantiomeric fraction (EF) of  $\alpha$ -TBECH in the passive water samples.

| Site name | EF    |
|-----------|-------|
| V1_Mid    | 0.451 |
| V9_Mid    | 0.460 |
| V9_Bot    | 0.452 |
| V10_Top   | 0.434 |
| V10_Mid   | 0.470 |
| V10_Bot   | 0.426 |

Text S9 Calculating water-air fugacity ratios and scavenging ratios

Comparing the relative values of the fugacities of a compound between multiple phases is a simple method to determine the net direction of exchange across the interface between phases, as chemicals diffuse from phases with high fugacity to those with low fugacity. With equal fugacities, equilibrium is achieved between the phases; therefore, the ratio of the fugacities in different phases also indicates the extent of deviation from equilibrium.

The fugacity of a compound in phase x (Pa) can be obtained from its volumetric concentration ( $C_x$ , mol  $m^{-3}$ ):

$$f_x = \frac{C_x}{Z_x} \quad (1)$$

where  $Z_x$  is the fugacity capacity of the compound in phase x ( $\text{mol Pa}^{-1}\text{m}^{-3}$ ).

Between two different phases x and y, diffusive exchange of the compound occurs at the interface of the phases, with the higher exchange range occurring from the phase with higher fugacity to that with lower fugacity. The ratio between the fugacities indicates the net direction of exchange. If the exchange between the phases occurs at equal rates, then the fugacities in the two phases are identical, i.e., the fugacity ratio is equal to one. Therefore, the fugacity capacity of a compound in phase x can be determined using the fugacity capacity of a compound in phase y and the partition ratio ( $K_{xy}$ ) of the two phases:

$$Z_x = K_{xy}Z_y \quad (2)$$

For the fugacity capacity of a compound in air, the value can be derived from the ideal gas law ( $Z_{\text{air}} = 1/RT$ ), which can be used in eq. 2 to find  $Z_{\text{water}}$  in a water-air system:

$$Z_{\text{water}} = \frac{1}{RTK_{aw}} \quad (3)$$

Using eq. 1 and 3, the water-air fugacity ratio can be calculated with eq 4:

$$f_{\text{water}}/f_{\text{air}} = \frac{C_{\text{water}}}{C_{\text{air}}} K_{aw} \quad (4)$$

where  $C_{\text{water}}$  and  $C_{\text{air}}$  are the volumetric concentration of the compound in water and air, respectively. Therefore, to investigate the diffusive gas exchange of the BFRs across the air-water interface, the water-air fugacity ratio was calculated for the PWS sites with measurements >LOD in BC, by multiplying the  $K_{AW}$  with the ratio of the water and air concentrations. Air measurements taken during the PWS campaign period from PAS sites located closest to each PWS site were used in this analysis.  $K_{AW}$  values for TBEC and BDE-47 were taken from COSMOtherm predictions (Table 1) and Cetin and Odabasi (2005), respectively.

The scavenging ratio (SR) of a compound is the ratio of the total precipitation concentration ( $C_{\text{prec}}$ ) to the total air concentration ( $C_{\text{air}}$ ) of the compound:

$$SR = \frac{C_{\text{prec}}}{C_{\text{air}}} \quad (5)$$

The SRs of the BFRs were calculated for each sampling month with precipitation and air measurements >LOD in BC and QC.



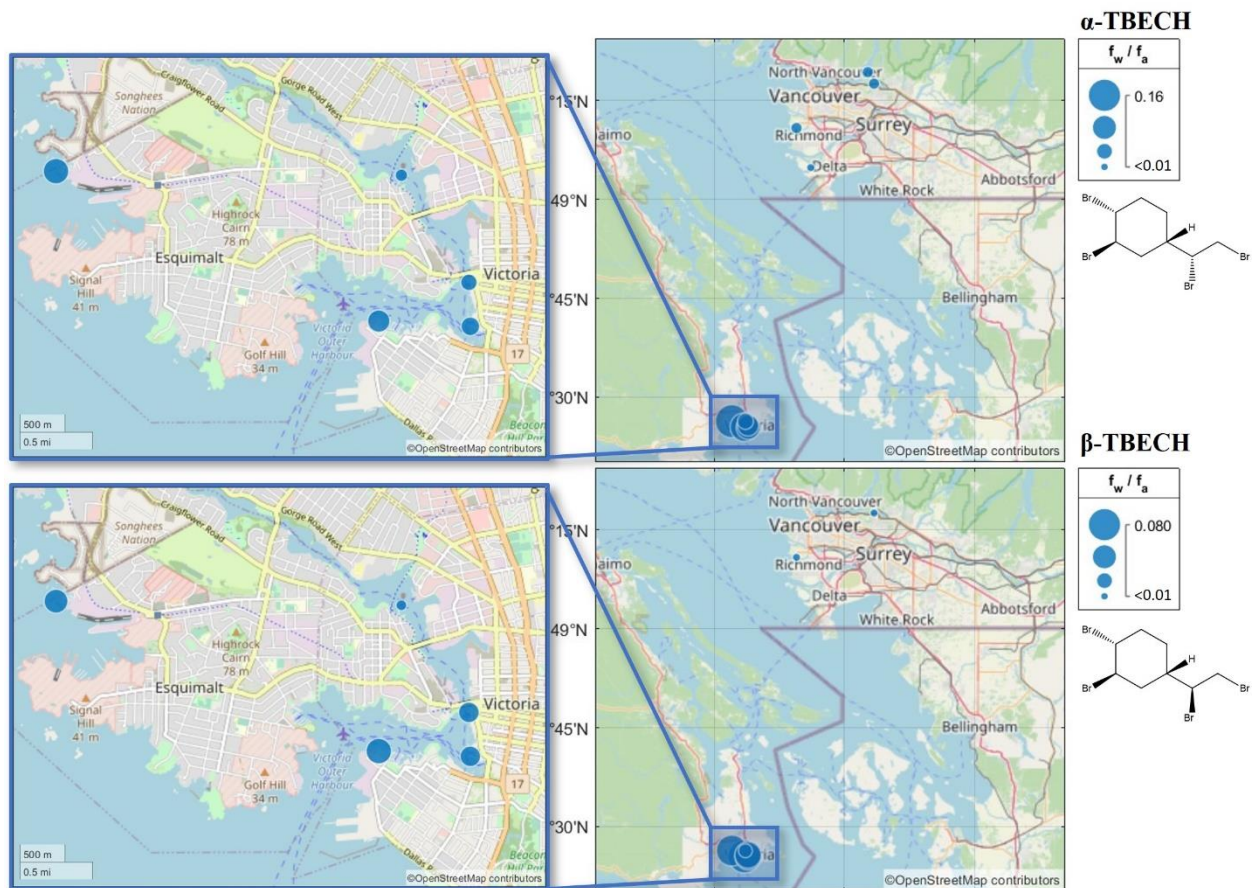

Figure S15 The spatial distribution of the water-air fugacity ratios of  $\alpha$ -TBECH (top) and  $\beta$ -TBECH (bottom) at the passive water sampling sites in British Columbia.

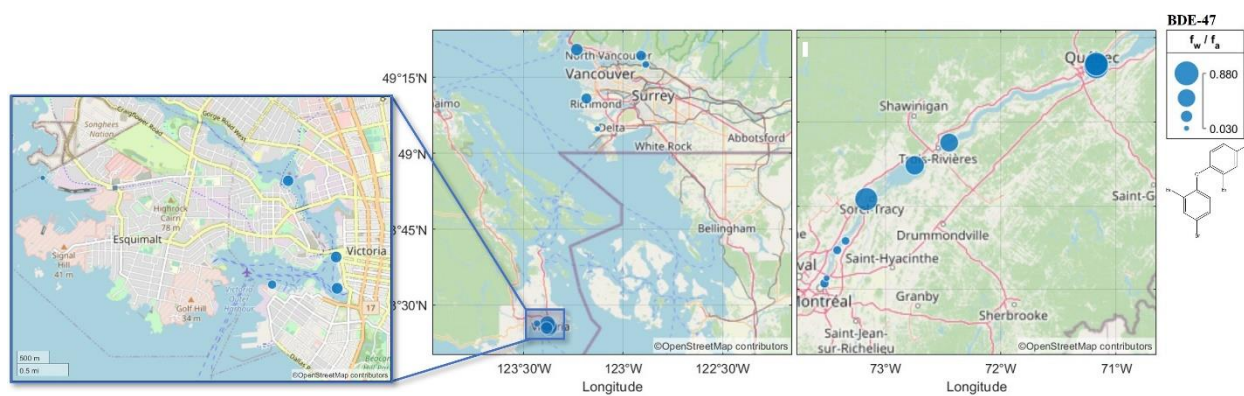

Figure S16 The spatial distribution of the water-air fugacity ratios of BDE-47 at the passive water sampling sites in British Columbia and Quebec.

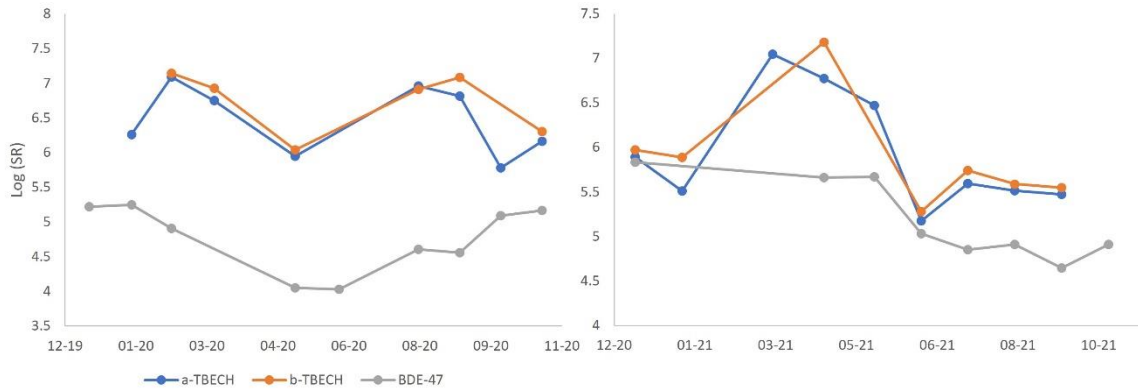

Figure S17 The seasonal variation of the logarithmic scavenging ratios (SRs) of  $\alpha$ - and  $\beta$ -TBECH and BDE-47 in Saturna Island (left) and Tadoussac (right).

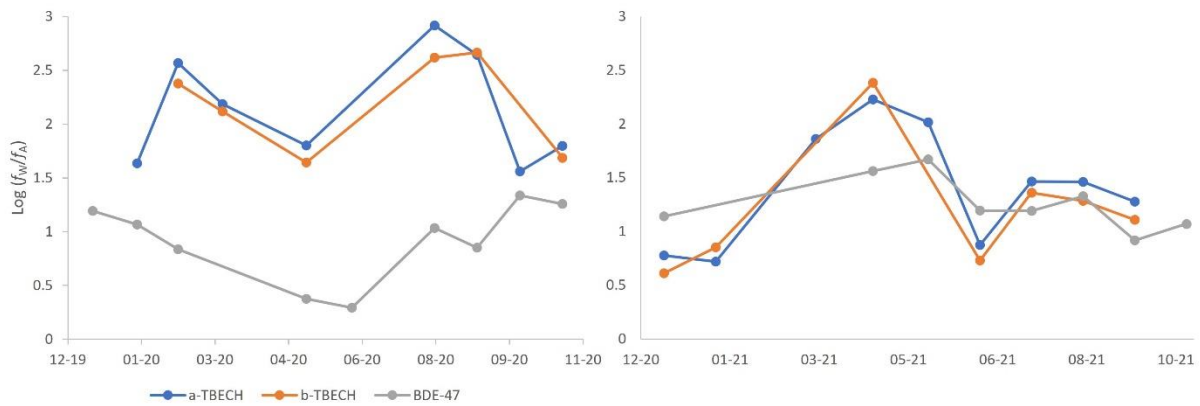

Figure S18 The seasonal variation of the logarithmic water (precipitation)-air fugacity ratios of  $\alpha$ - and  $\beta$ -TBECH and BDE-47 in Saturna Island (left) and Tadoussac (right).

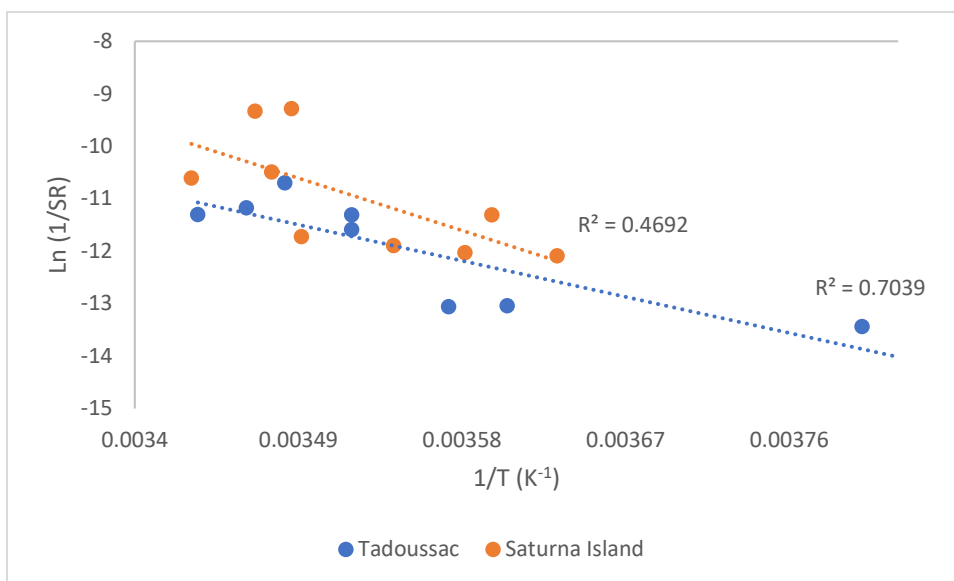

Figure S19 The temperature dependence of the scavenging ratio of BDE-47 in Tadoussac, QC and Saturna Island, BC.

Table S22 Linear regression parameters for the temperature dependence of the scavenging ratio

|                                                                     |            | Coefficient | Std. error | t      | P     | (Adjusted) R <sup>2</sup> | Significance F |
|---------------------------------------------------------------------|------------|-------------|------------|--------|-------|---------------------------|----------------|
| <i>Saturna Island, BC (x-variable: 1/AAT; y-variable: Ln(1/SR))</i> |            |             |            |        |       |                           |                |
| $\alpha$ -TBECH<br>(n=8)                                            | Intercept  | -8.47       | 21.56      | -0.39  | 0.71  | (-0.15) 0.015             | 0.78           |
|                                                                     | x-variable | -1822.57    | 6103.68    | -0.30  | 0.78  |                           |                |
| $\beta$ -TBECH<br>(n=6)                                             | Intercept  | -2.00       | 23.93      | -0.084 | 0.94  | (-0.16)<br>0.074          | 0.60           |
|                                                                     | x-variable | -3837.91    | 6796.33    | -0.56  | 0.60  |                           |                |
| BDE-47<br>(n=9)                                                     | Intercept  | 28.08       | 15.70      | 1.79   | 0.12  | (0.39) 0.47               | 0.042          |
|                                                                     | x-variable | -11084.00   | 4455.90    | -2.49  | 0.042 |                           |                |
| <i>Tadoussac, QC (x-variable: 1/AAT; y-variable: Ln(1/SR))</i>      |            |             |            |        |       |                           |                |
| $\alpha$ -TBECH<br>(n=9)                                            | Intercept  | 7.58        | 11.92      | 0.64   | 0.54  | (0.21)<br>0.31            | 0.12           |
|                                                                     | x-variable | -5906.97    | 3309.58    | -1.78  | 0.12  |                           |                |
| $\beta$ -TBECH<br>(n=7)                                             | Intercept  | 0.18        | 15.68      | 0.011  | 0.99  | (-0.040)<br>0.13          | 0.42           |
|                                                                     | x-variable | -3845.99    | 4389.22    | -0.88  | 0.42  |                           |                |
| BDE-47<br>(n=8)                                                     | Intercept  | 15.18       | 7.19       | 2.11   | 0.079 | (0.65)<br>0.70            | 0.009          |
|                                                                     | x-variable | -7642.51    | 2023.49    | -3.78  | 0.009 |                           |                |



## References

- Arsenault, G., Lough, A., Marvin, C., McAlees, A., McCrindle, R., MacInnis, G., Pleskach, K., Potter, D., Riddell, N., Sverko, E., Tittlemier, S., and Tomy, G.: Structure characterization and thermal stabilities of the isomers of the brominated flame retardant 1,2-dibromo-4-(1,2-dibromoethyl)cyclohexane, *Chemosphere*, 72, 1163-1170, <https://doi.org/10.1016/j.chemosphere.2008.03.044>, 2008.
- Bohlin, P., Audy, O., Škrdlíková, L., Kukučka, P., Příbylová, P., Prokeš, R., Vojta, Š., and Klánová, J.: Outdoor passive air monitoring of semi volatile organic compounds (SVOCs): a critical evaluation of performance and limitations of polyurethane foam (PUF) disks, *Environ. Sci. Processes Impacts*, 16, 433-444, <https://doi.org/10.1039/C3EM00644A>, 2014.
- Booij, K. and Smedes, F.: An Improved Method for Estimating in Situ Sampling Rates of Nonpolar Passive Samplers, *Environ. Sci. Technol.*, 44, 6789-6794, <https://doi.org/10.1021/es101321v>, 2010.
- Canada, S.: Census Profile, 2021: Canada, Provinces and Territories, Statistics Canada, <https://www12.statcan.gc.ca/census-recensement/2021/dp-pd/prof/details/download-telecharger.cfm?Lang=E>, 2021.
- Carlsson, P., Vrana, B., Sobotka, J., Borgå, K., Bohlin Nizzetto, P., and Varpe, Ø.: New brominated flame retardants and dechlorane plus in the Arctic: Local sources and bioaccumulation potential in marine benthos, *Chemosphere*, 211, 1193-1202, <https://doi.org/10.1016/j.chemosphere.2018.07.158>, 2018.
- Cequier, E., Ionas, A. C., Covaci, A., Marcé, R. M., Becher, G., and Thomsen, C.: Occurrence of a Broad Range of Legacy and Emerging Flame Retardants in Indoor Environments in Norway, *Environ. Sci. Technol.*, 48, 6827-6835, <https://doi.org/10.1021/es500516u>, 2014.
- Cetin, B. and Odabasi, M.: Measurement of Henry's law constants of seven polybrominated diphenyl ether (PBDE) congeners as a function of temperature, *Atmos. Environ.*, 39, 5273-5280, <https://doi.org/10.1016/j.atmosenv.2005.05.029>, 2005.
- Drage, D. S., Newton, S., de Wit, C. A., and Harrad, S.: Concentrations of legacy and emerging flame retardants in air and soil on a transect in the UK West Midlands, *Chemosphere*, 148, 195-203, <https://doi.org/10.1016/j.chemosphere.2016.01.034>, 2016.
- Genisoglu, M., Sofuoglu, A., Kurt-Karakus, P. B., Birgul, A., and Sofuoglu, S. C.: Brominated flame retardants in a computer technical service: Indoor air gas phase, submicron (PM1) and coarse (PM10) particles, associated inhalation exposure, and settled dust, *Chemosphere*, 231, 216-224, <https://doi.org/10.1016/j.chemosphere.2019.05.077>, 2019.
- Hong, W.-J., Jia, H., Ding, Y., Li, W.-L., and Li, Y.-F.: Polychlorinated biphenyls (PCBs) and halogenated flame retardants (HFRs) in multi-matrices from an electronic waste (e-waste) recycling site in Northern China, *J. Mater. Cycles Waste Manage.*, 20, 80-90, <https://doi.org/10.1007/s10163-016-0550-8>, 2018.
- Khawar, M. I. and Nabi, D.: Relook on the Linear Free Energy Relationships Describing the Partitioning Behavior of Diverse Chemicals for Polyethylene Water Passive Samplers, *ACS Omega*, 6, 5221-5232, <https://doi.org/10.1021/acsomega.0c05179>, 2021.
- Klamt, A., Eckert, F., and Diedenhofen, M.: Prediction of partition coefficients and activity coefficients of two branched compounds using COSMOtherm, *Fluid Phase Equilibria*, 285, 15-18, <https://doi.org/10.1016/j.fluid.2009.05.010>, 2009.
- Li, Y., Zhan, F., Lei, Y. D., Shunthirasingham, C., Hung, H., and Wania, F.: Field Calibration and PAS-SIM Model Evaluation of the XAD-Based Passive Air Sampler for Semi-Volatile Organic Compounds, *Environ. Sci. Technol.*, 57, 9224-9233, <https://doi.org/10.1021/acs.est.3c00809>, 2023.
- Ma, W.-L., Li, W.-L., Zhang, Z.-F., Liu, L.-Y., Song, W.-W., Huo, C.-Y., Yuan, Y.-X., and Li, Y.-F.: Occurrence and source apportionment of atmospheric halogenated flame retardants in Lhasa City in the Tibetan Plateau, China, *Sci. Total Environ.*, 607-608, 1109-1116, <https://doi.org/10.1016/j.scitotenv.2017.07.112>, 2017.

Melymuk, L., Bohlin-Nizzetto, P., Kukučka, P., Vojta, Š., Kalina, J., Čupr, P., and Klánová, J.: Seasonality and indoor/outdoor relationships of flame retardants and PCBs in residential air, *Environ. Pollut.*, 218, 392-401, <https://doi.org/10.1016/j.envpol.2016.07.018>, 2016.

NASA: Earth Science Data Systems, NASA [dataset], <https://www.earthdata.nasa.gov/>, 2015.

Newton, S., Sellström, U., and de Wit, C. A.: Emerging Flame Retardants, PBDEs, and HBCDDs in Indoor and Outdoor Media in Stockholm, Sweden, *Environ. Sci. Technol.*, 49, 2912-2920, <https://doi.org/10.1021/es505946e>, 2015.

Newton, S., Sellström, U., Harrad, S., Yu, G., and de Wit, C. A.: Comparisons of indoor active and passive air sampling methods for emerging and legacy halogenated flame retardants in Beijing, China offices, *Emerging Contam.*, 2, 80-88, <https://doi.org/10.1016/j.emcon.2016.02.001>, 2016.

Pisso, I., Sollum, E., Grythe, H., Kristiansen, N. I., Cassiani, M., Eckhardt, S., Arnold, D., Morton, D., Thompson, R. L., Groot Zwaaftink, C. D., Evangeliou, N., Sodemann, H., Haimberger, L., Henne, S., Brunner, D., Burkhardt, J. F., Fouilloux, A., Brioude, J., Philipp, A., Seibert, P., and Stohl, A.: The Lagrangian particle dispersion model FLEXPART version 10.4, *Geosci. Model Dev.*, 12, 4955-4997, <https://doi.org/10.5194/gmd-12-4955-2019>, 2019.

Sauvage, B., Fontaine, A., Eckhardt, S., Auby, A., Boulanger, D., Petetin, H., Paugam, R., Athier, G., Cousin, J. M., Darras, S., Nédélec, P., Stohl, A., Turquety, S., Cammas, J. P., and Thouret, V.: Source attribution using FLEXPART and carbon monoxide emission inventories: SOFT-IO version 1.0, *Atmos. Chem. Phys.*, 17, 15271-15292, <https://doi.org/10.5194/acp-17-15271-2017>, 2017.

Shoeib, M., Ahrens, L., Jantunen, L., and Harner, T.: Concentrations in air of organobromine, organochlorine and organophosphate flame retardants in Toronto, Canada, *Atmos. Environ.*, 99, 140-147, <https://doi.org/10.1016/j.atmosenv.2014.09.040>, 2014.

Smedes, F., Geertsma, R. W., Zande, T. v. d., and Booij, K.: Polymer–Water Partition Coefficients of Hydrophobic Compounds for Passive Sampling: Application of Cosolvent Models for Validation, *Environ. Sci. Technol.*, 43, 7047-7054, <https://doi.org/10.1021/es9009376>, 2009.

Tao, F., Abdallah, M. A.-E., and Harrad, S.: Emerging and Legacy Flame Retardants in UK Indoor Air and Dust: Evidence for Replacement of PBDEs by Emerging Flame Retardants?, *Environ. Sci. Technol.*, 50, 13052-13061, <https://doi.org/10.1021/acs.est.6b02816>, 2016.

UFZ-LSER database v 3.2. 1: <http://www.ufz.de/lserd>, last access: May 31, 2023.

Wong, F., Kurt-Karakus, P., and Bidleman, T. F.: Fate of Brominated Flame Retardants and Organochlorine Pesticides in Urban Soil: Volatility and Degradation, *Environ. Sci. Technol.*, 46, 2668-2674, <https://doi.org/10.1021/es203287x>, 2012.

Wong, F., de Wit, C. A., and Newton, S. R.: Concentrations and variability of organophosphate esters, halogenated flame retardants, and polybrominated diphenyl ethers in indoor and outdoor air in Stockholm, Sweden, *Environ. Pollut.*, 240, 514-522, <https://doi.org/10.1016/j.envpol.2018.04.086>, 2018.

Zhao, J., Wang, P., Wang, C., Fu, M., Li, Y., Yang, R., Fu, J., Hao, Y., Matsiko, J., Zhang, Q., and Jiang, G.: Novel brominated flame retardants in West Antarctic atmosphere (2011–2018): Temporal trends, sources and chiral signature, *Sci. Total Environ.*, 720, 137557, <https://doi.org/10.1016/j.scitotenv.2020.137557>, 2020.
